# 1 Improved methods and optimized design for CRISPR Cas9 and 2 Cas12a homology-directed repair

3 Mollie S. Schubert<sup>1</sup>, Bernice Thommandru<sup>1</sup>, Jessica Woodley<sup>1</sup>, Rolf Turk<sup>1</sup>, Shuqi Yan<sup>1,2</sup>, Gavin  
4 Kurgan<sup>1</sup>, Matthew S. McNeill<sup>1</sup> and Garrett R. Rettig<sup>1,\*</sup>

5 <sup>1</sup> Integrated DNA Technologies, Inc., Coralville, IA, 52241, USA

6 <sup>2</sup> Present address: BGI Genomics, BGI-Shenzhen, Shenzhen 518083, China.

7 \* Correspondence should be addressed to G.R.R. (Email: [grettig@idtdna.com](mailto:grettig@idtdna.com))

8

## 9 ABSTRACT

10 CRISPR-Cas proteins are used to introduce double-stranded breaks (DSBs) at targeted genomic loci.  
11 DSBs are repaired by endogenous cellular pathways such as non-homologous end joining (NHEJ)  
12 and homology-directed repair (HDR). Providing a DNA template during repair allows for precise  
13 introduction of a desired mutation via the HDR pathway. However, rates of repair by HDR are often  
14 slow compared to the more rapid but less accurate NHEJ-mediated repair. Here, we describe  
15 comprehensive design considerations and optimized methods for highly efficient HDR using single-  
16 stranded oligodeoxynucleotide (ssODN) donor templates for several CRISPR-Cas systems including  
17 *S.p.* Cas9, *S.p.* Cas9 D10A nickase, and *A.s.* Cas12a delivered as ribonucleoprotein complexes with  
18 synthetic guide RNAs. Features relating to guide RNA selection, donor strand preference, and  
19 incorporation of blocking mutations in the donor template to prevent re-cleavage were investigated  
20 and were implemented in a novel online tool for HDR donor template design. Additionally, we employ  
21 chemically modified HDR donor templates in combination with a small molecule to boost HDR  
22 efficiency up to 10-fold. These findings allow for high frequencies of precise repair utilizing HDR in  
23 multiple mammalian cell lines. Tool availability: [www.idtdna.com/HDR](http://www.idtdna.com/HDR)

24

## 25 INTRODUCTION

26 CRISPR-Cas systems have revolutionized genomics by enabling efficient and precise genome editing  
27 in a wide variety of biological systems, including eukaryotic cells.<sup>1-5</sup> These systems require an RNA-  
28 guided DNA endonuclease and a target-specific guide RNA (gRNA) to generate a double-stranded  
29 break (DSB) at a desired genomic location, which must be flanked by a short protospacer adjacent

30 motif (PAM). *Streptococcus pyogenes* Cas9 (*S.p.* Cas9) is one of the most commonly used CRISPR  
31 enzymes for genome editing. The native gRNA for Cas9 is hybridized from two RNA molecules: a  
32 CRISPR RNA (crRNA) and a universal, trans-activating crRNA (tracrRNA).<sup>6</sup> The two strands of the  
33 gRNA can also be combined as a single unimolecular structure to form a single-guide RNA (sgRNA).<sup>7</sup>  
34 Association of Cas9 protein with a gRNA forms a ribonucleoprotein (RNP) complex, which surveys a  
35 dsDNA substrate and generates a DSB when its complementary target sequence with a PAM is  
36 recognized by an active Cas9 RNP complex.<sup>8-10</sup>

37 Recent reports have demonstrated that RNP delivery of nucleases has benefits over plasmid delivery  
38 as it enables a faster onset of action, reduces off-target cleavage, and eliminates the risk of random  
39 plasmid integration into the host genome.<sup>9,11,12</sup> At the same time, RNP delivery allows for the use of  
40 chemically modified gRNA with improved stability and reduced toxicity.<sup>13</sup> In addition, generating RNP  
41 complexes *in vitro* prior to delivery allows accurate control of the ratio of protein and gRNA to  
42 maximize RNP complexation efficiency. This also enables the formation of each gRNA:protein  
43 complex independently which mitigates the competition for Cas9 protein by other intracellular RNA  
44 molecules or by different gRNAs during multiplexing experiments.<sup>14</sup>

45 *S.p.* Cas9 contains two endonuclease domains (HNH and RuvC) that function together to generate a  
46 blunt DSB by each domain cleaving opposite DNA strands. Inactivating one of the two endonuclease  
47 domains results in Cas9 variants called “nickases”: the RuvC-inactive variant (Cas9 D10A) nicks the  
48 target (gRNA complementary) strand, while the HNH-inactive variant (Cas9 H840A) nicks the non-  
49 target (gRNA non-complementary) strand.<sup>7</sup> Cas9 nickases can be used with an individual guide to  
50 induce single DNA nicks and induce a repair pathway termed alternative-HDR.<sup>15,16</sup> However, it is  
51 more common and often more efficient to perform genome editing at DSBs generated by using a  
52 nickase with a pair of gRNAs targeting opposite DNA strands in a “paired nicking strategy”.<sup>17</sup> It has  
53 been demonstrated that nickases allow for the reduction of off-target editing by ~50-1500 fold in  
54 comparison to Cas9 WT.<sup>17-19</sup> At the same time, the paired nicking strategy can facilitate highly robust  
55 editing in many model systems, including mammalian tissue culture, mouse zygotes, plants, yeast,  
56 and bacteria.<sup>1,17-26</sup>

57 Cas12a enzymes are also RNA-guided double-stranded DNA nucleases that provide an alternative to  
58 the commonly used *S.p.* Cas9 nuclease with similar editing outcomes. Unlike *S.p.* Cas9, which  
59 recognizes an NGG PAM sequence, *A.s.* Cas12a recognizes a TTTV (V = A/G/C) PAM site which

60 allows for a broadened range of targeting sites in AT-rich regions. Cas12a relies on a single, short  
61 (41-44 nt) gRNA and generates staggered DSBs with 5' overhangs.<sup>4</sup> In addition, Cas12a has been  
62 shown to be advantageous due to intrinsically high specificity, reducing the potential for off-target  
63 cleavage.<sup>27,28</sup> However, Cas12a also has non-specific single-stranded DNase (ssDNase) activity that  
64 is activated upon binding to the target DNA strand.<sup>29</sup> This could potentially impact the ability of  
65 Cas12a to mediate efficient HDR if the ssODN is degraded before it is able to act as a donor  
66 template.

67 To facilitate genome editing, CRISPR-Cas enzymes are used to generate a DSB at a genomic locus  
68 which can then be repaired by a variety of endogenous cellular repair pathways including non-  
69 homologous end joining (NHEJ) and homology-directed repair (HDR).<sup>30,31</sup> NHEJ is an imperfect  
70 process and commonly creates small insertions or deletions (indels), which can be exploited to  
71 introduce diverse, but reproducible genetic mutations or gene knockouts.<sup>32</sup> On the other hand, HDR is  
72 a process that can lead to precise sequence alterations at specified genomic locations but requires  
73 the use of a carefully designed HDR donor template that contains sequences homologous to the  
74 specific sequence flanking the cut site, defined as 'homology arms'. However, rates of repair by HDR  
75 are often slow compared to the more rapid but less accurate NHEJ-mediated repair.<sup>33</sup> For small  
76 mutations or insertions, a ssODN can be used as the HDR donor template.<sup>34-37</sup> These are readily  
77 available up to 200 nucleotides (nt) in length as chemically synthesized oligos, allowing for insertions  
78 up to 160 nt (maintaining, at minimum, 20-nt homology arms).

79 Two distinct pathways for the incorporation of single-stranded donor templates at a DSB have been  
80 proposed – single-strand DNA incorporation (ssDI) and synthesis-dependent strand annealing  
81 (SDSA), with SDSA being preferentially utilized as the repair path for ssODN donor templates in the  
82 presence of a DSB.<sup>38</sup> Previous studies have examined design considerations for ssODNs when using  
83 CRISPR-Cas enzymes. The optimal length of homology arms has been reported to be as little as 30-  
84 nt in length on either side of the DSB, and it has been demonstrated that asymmetric donor oligos can  
85 improve HDR.<sup>39,40</sup> HDR efficiency is highest when the intended edit is placed near the DSB and is  
86 greatly reduced at loci distal to this event.<sup>35,41</sup> In addition, reports have indicated that there may be a  
87 preference for utilizing a donor oligo with sequences either complementary or non-complementary to  
88 the gRNA.<sup>37,42-44</sup> CRISPR-Cas9 can also re-cut dsDNA after a desired repair outcome if the

89 protospacer and PAM sequence remains unaltered, lowering perfect HDR efficiency. This outcome  
90 can be prevented by strategically incorporating blocking mutations into the donor template.<sup>35,45</sup>  
91 Other approaches to improving HDR are of great interest to the genome editing community. It has  
92 been previously reported that incorporating chemical modifications such as phosphorothioate (PS)  
93 linkages may improve HDR when using ssODN donors.<sup>39,46</sup> Another route to improving HDR  
94 frequency is using chemical compounds that inhibit key DSB repair enzymes that play a role in the  
95 competing NHEJ pathway. Several chemical compounds have been reported to increase HDR.<sup>47-49</sup>  
96 In this work, we thoroughly investigated design features for both *S.p.* Cas9 and *A.s.* Cas12a  
97 nucleases relating to gRNA selection, donor strand preference, the placement and composition of  
98 blocking mutations, and the number of blocking mutations that are required for maximum HDR  
99 efficiency. We additionally investigated alternate end-blocking oligo modifications to further stabilize  
100 the ssODN from exonuclease activity and have developed a novel modification, which is incorporated  
101 into Alt-R HDR Donor Oligos, that improves upon previously reported constructs. Here, we  
102 demonstrate that the use of end-modified Alt-R HDR Donor Oligos along with Alt-R HDR Enhancers,  
103 small molecules that inhibit NHEJ-mediated repair, combine to significantly increase the rate of HDR  
104 when delivered with CRISPR RNP complexes in mammalian cell lines. Altogether, this study presents  
105 a set of design considerations and reagents which can be applied to CRISPR editing experiments to  
106 maximize HDR efficiency and reduce time spent generating desired mutants. Our findings constitute  
107 an empirically defined ruleset for *S.p.* Cas9 and *S.p.* Cas9 D10A nickase which have been built into a  
108 novel bioinformatic tool for HDR donor template design. Further, we provide design recommendations  
109 for *A.s.* Cas12a nuclease, which has not yet been systematically studied in the same manner as  
110 Cas9.

111

## 112 **RESULTS**

### 113 **Cas9 donor strand preference and gRNA selection**

114 While some studies have suggested that there is a strand preference for the ssODN donor template,  
115 where one strand's homology sequence consistently mediates improved HDR frequency over the  
116 other strand, results have varied and no universal strand preference has been identified.<sup>37,42-44</sup> To  
117 elucidate any universal strand preference of the HDR donor template with WT Cas9 nuclease,  
118 particularly when delivered as an ribonucleoprotein (RNP) complex, HDR efficiency was tested at 254

119 genomic loci in Jurkat cells and 239 genomic loci in HAP1 cells. Donor ssODNs containing 40-nt  
120 homology arms were designed to insert a six base EcoRI restriction digest recognition site  
121 ('GAATTC') at the Cas9 cleavage site which canonically lies three bases in the 5' direction of the  
122 PAM, as illustrated in Figure 1A. ssODNs were delivered to Jurkat and HAP1 cells along with their  
123 respective Cas9 RNP complex by nucleofection, and the editing frequencies were assessed by next  
124 generation sequencing (NGS). Perfect HDR, defined as the precise insertion of the EcoRI sequence  
125 at the canonical cut site and otherwise maintaining the WT sequence, was quantified and  
126 comparisons were made between donor templates consisting of either the targeting strand (T), which  
127 is complementary to the CRISPR-Cas9 gRNA, or the non-targeting strand (NT), which contains the  
128 'NGG' PAM sequence. In Jurkat cells there was no statistical difference ( $p>0.05$ , paired t-test) in total  
129 editing when either the T or NT strand was used. However, a significant difference in editing efficiency  
130 ( $p<0.0001$ , paired t-test) was observed in HAP1 cells where the mean editing was 80.2% when the  
131 NT strand was used and 67.8% when the T strand was used, indicating that the T strand may bind to  
132 the Cas9 RNP complex and reduce overall editing efficiency within the cellular environment, as  
133 suggested by others (Supplemental Figure 1A).<sup>36</sup> As demonstrated in the top two panels of Figure 1B,  
134 the strand that leads to higher frequencies of HDR varies depending on the genomic locus and cell  
135 type being used. HAP1 cells had HDR frequencies ranging from 0 to 51.1% with a significantly higher  
136 mean HDR frequency when the NT strand was used (20.6%) than the T strand (15.2%) ( $p<0.0001$ ,  
137 paired t-test), likely due to the reduced total editing when the T strand was used. In contrast, we  
138 observed significantly higher mean HDR frequencies in Jurkat cells when the T strand was used than  
139 when the NT strand was used (11.3% vs 7.5%, respectively) ( $p<0.0001$ , paired t-test). Overall, HDR  
140 efficiency in HAP1 cells was higher than in Jurkat cells, with mean HDR frequencies of 17.9% and  
141 9.4%, respectively. In addition, the bottom two panels of Figure 1B show that although efficient total  
142 editing is required for HDR to occur, high editing does not always lead to high HDR insertion at each  
143 site tested. For example, even though 53% of the sites tested in HAP1 cells and 74% of the sites  
144 tested in Jurkat cells had  $>90\%$  total editing, there is a broad range of HDR frequencies which varied  
145 from 0 to 60% among these highly edited loci for both the NT and T strands. This emphasizes the  
146 value of testing multiple guides to determine which have the highest potential HDR frequency prior to  
147 any experiment where precise genome modification by HDR is desired.

148 To investigate the balance between guide cleavage efficiency and distance of the desired HDR  
149 mutation to the cut site, we selected 13 guides flanking the stop codon of GAPDH to determine which  
150 led to the highest HDR insertion frequency of an EcoRI site just upstream of the 'TAA' stop codon.  
151 These guides had cut sites that ranged from 2 to 22 bases from the desired insertion position (Figure  
152 1C). The available guides in the nearby region included PAMs on both strands of the genomic DNA,  
153 and ssODNs for both the targeting and non-targeting strand were designed and tested in K562 and  
154 HEK293 cells for their ability to mediate HDR. As shown in Figure 1D in K562 cells, guides with low  
155 editing efficiency yielded low HDR insertion, even if the cut site was close to the desired insertion  
156 location. For example, the guide that cuts two bases from the desired insertion (-2) had 32.1% total  
157 editing of which 12.6% was HDR insertion (NT strand). Similarly, the guide that cuts five bases from  
158 the desired insertion (-5) had 10.7% total editing and only 1.1% HDR insertion. In contrast, the guides  
159 that cut 14 and 6 bases from the desired insertion (-14, +6) had 96.0% total editing of which 40.7%  
160 was HDR insertion (NT strand) and 87.8% total editing of which 39.7% was HDR insertion (NT  
161 strand), respectively. As determined by NGS, these guides had the highest total editing and HDR  
162 insertion rates, even though they were further from the desired insertion. This case study indicates  
163 that guide efficiency is a critical factor for efficient HDR, and guide selection that is as close as  
164 possible to the desired HDR mutation is a secondary consideration. This was also observed in  
165 HEK293 cells, where a guide that cuts 6 bases from the insertion (+6: 97% total editing, 34% HDR)  
166 led to higher HDR than guides 2 or 5 bases from the insertion (-5: 34.7% total editing, 12.7% HDR; -2:  
167 62.2% total editing, 22.4% HDR). This effect was less prominent using guides further from the desired  
168 insertion site (e.g. -14) in HEK293 cells, which may be due to differences in the available repair  
169 machinery and capacity for HDR in each cell type (Supplemental Figure 1B).

170 We performed a similar experiment at a second genomic locus (TNPO3) in HEK293 cells to further  
171 examine factors influencing HDR (Supplemental Figure 1C). The total editing was high for nearly all  
172 guides tested in this experiment. However, for a guide with a cut site 9 bases from the desired  
173 insertion location (-9) the total editing was 92.6%, and this site yielded reduced HDR efficiency of  
174 7.0% compared to the guide that cut one base further from the desired insertion (-10) with an  
175 increased 98.5% total editing that also gave an increased HDR insertion frequency of 24.2% with the  
176 NT strand, further supporting that guide activity can be more impactful on HDR efficiency than optimal  
177 positioning with respect to the cut site.

178

### 179 **Cas9 D10A mediates efficient HDR distant from nick sites**

180 In comparison to WT Cas9, which needs only one gRNA to cut both strands of the target DNA, Cas9  
181 D10A and H840A nickases can be used with paired guides to generate a DSB to mediate genome  
182 editing. To facilitate a DSB, the guides must target opposite strands of the genomic DNA and can be  
183 oriented with their PAM sites facing toward each other (PAM-in), or apart from each other (PAM-out)  
184 (Supplemental Figure S2A). Guides that target the same DNA strand where one PAM site would face  
185 in and the second would face out would not be generate a DSB (unless the two nickase variants,  
186 D10A and H840A, were used in combination which significantly complicates the experiment).  
187 Consistent with other reports utilizing Cas9 nickase variants expressed from a plasmid,<sup>17,21</sup> we found  
188 a higher rate of indel formation when D10A and H840A nickases were designed in a PAM-out  
189 orientation, and the nickases must be placed with optimal spacing between the nick sites to mediate  
190 efficient editing (Supplemental Figure S2B). Here, we designed a set of paired guides against the  
191 human *HPRT1* gene with either PAM-out or PAM-in orientation and target nick sites separated by 18–  
192 130 bp. We specifically selected gRNAs that have >40% editing efficiency (data not shown) when  
193 delivered with WT Cas9 as RNP into HEK-293 cells, to rule out the possibility that poor editing by the  
194 nickase RNP pair is caused by poor cleavage efficiency mediated by individual gRNA. The optimal  
195 distance (>40% editing as determined by T7EI) between the two nicks was 40-68 nt for Cas9 D10A,  
196 and 51-68 nt for Cas9 H840A. For the PAM-out pair with nicks 68-nt apart, the editing was 86.3% with  
197 Cas9 D10A and 77.6% with Cas9 H840A. This was reduced to 29.8% and 2.7%, respectively, when  
198 the nicks were 85-nt apart. Similarly, for Cas9 H840A, the editing was 74.7% when the nicks were  
199 spaced 51-nt apart, and this was reduced to 34.6% when the distance between the nicks was  
200 decreased to 46-nt. We have investigated distances smaller than 40-nt between the nicks in PAM-out  
201 orientation for Cas9 D10A and found that editing was poor for spacing <35-nt, likely due to steric  
202 hindrance between the two RNP molecules (data not shown).  
203 When Cas9 D10A nickase RNP complexes targeting both strands in the PAM-out orientation nick the  
204 genomic DNA, a DSB with 5' overhangs is generated. Because both strands are targeted by one of  
205 the two gRNAs, there is no canonical 'targeting' and 'non-targeting' strand in nickase experiments;  
206 thus, they are referred to as top and bottom strands. The paired-guide double nicking strategy doesn't  
207 generate a blunt-ended cut like WT Cas9, so we further explored the possibility of using Cas9 D10A

208 to insert exogenous sequences between flanking nick sites at a location that would be otherwise  
209 considered sub-optimal for WT Cas9 designs using WT Cas9 and either gRNA on its own. We  
210 designed ssODN donor templates for *HPRT1* in which a 6-nt EcoRI restriction enzyme recognition  
211 site was introduced at different locations along a donor template (Figure 2A). HDR events mediated  
212 by Cas9 D10A in HEK293 cells, as measured by the percentage of EcoRI digestion, ranged from 13-  
213 25% across the 51-nt region (Figure 2B, top left panel). In contrast, WT Cas9-mediated HDR  
214 decreased dramatically as the intended insertion site moved away from the cleavage site (Figure 2B,  
215 top middle and right panels), consistent with our earlier findings. At the position centered between the  
216 two cleavage sites (25-nt from left and 26-nt from the right), Cas9 D10A was able to induce a higher  
217 HDR insertion frequency than WT Cas9 with either of the individual gRNAs. As a comparison, neither  
218 WT Cas9 nor Cas9 H840A with the same gRNA pair demonstrated HDR insertion frequency as high  
219 as Cas9 D10A at all positions tested (Supplementary Figure S2C). In addition, at these sites WT  
220 Cas9 demonstrated a strong preference for the NT strand donor template (bottom strand for WT with  
221 left gRNA, and top strand for WT with right gRNA), especially at positions distant from the cut site,  
222 while Cas9 D10A did not show a strand preference. We performed the same experiment in K562  
223 cells, which demonstrated robust HDR overall with WT Cas9. As expected, despite both Cas9 D10A  
224 and WT Cas9 showing a higher frequency of HDR in this cell line, the ability of Cas9 D10A to mediate  
225 higher HDR when moving away from cleavage sites was retained (Figure 2B, bottom panels).  
226 In order to verify that the above observations are not site specific, we conducted a similar experiment  
227 at a different locus (*AAVS1*, PAM-out design with 46-nt spacing). In addition to 5 insert positions at or  
228 between the two cleavage sites, we also included two positions 12-nt upstream or downstream to the  
229 left or right cleavage sites, respectively (Supplementary Figure S2D). Consistent with the results  
230 described above, Cas9 D10A outperformed WT Cas9 at the position centered between the cleavage  
231 sites (position "D") in HEK293 cells (Supplementary Figure S2E). Insertions outside of the nick sites  
232 were not as efficient as ones placed between the nick sites. The observation that Cas9 D10A has no  
233 identifiable strand preference for the HDR donor template also held true at this site. For HDR  
234 experiments with Cas9 D10A, the highest editing efficiency occurred when paired gRNAs were in the  
235 PAM-out orientation with the nick sites spaced 40-68 nt apart. Overall, we observed that the desired  
236 mutation is best achieved when placed between the two nicks, and we did not observe a consistent  
237 strand preference. The use of paired gRNAs with Cas9 D10A nickase allows for HDR insertions at



238 locations not accessible by WT Cas9 nuclease due to design limitations and may be advantageous  
239 over WT Cas9 in situations where there is a lack of efficient Cas9 guides near the intended HDR  
240 mutation.

241

### 242 **Optimizing placement and number of blocking mutations with Cas9**

243 Previous studies have demonstrated that incorporating blocking mutations within the donor oligo to  
244 prevent re-cleavage by Cas9 nuclease after a desired HDR event improves rates of HDR.<sup>35,45</sup>

245 However, these studies have been limited in the number of constructs tested and have not examined  
246 if there is a preference for transversions (e.g. G-to-C purine to pyrimidine conversion), or transitions  
247 (e.g. G-to-A purine to purine conversion) in the blocking mutations used. We aimed to further  
248 investigate this to define a ruleset for the placement and number of blocking mutation(s) required to  
249 maximize HDR efficiency. First, we designed an experiment to determine the effect of a single  
250 blocking mutation within the PAM or the seed region of Cas9, which is defined as the PAM-proximal  
251 10-12 bases on the 3' end of the guide.<sup>7</sup> Mismatches within the seed region and PAM are known to  
252 significantly reduce Cas9 binding and cleavage efficiency, so would be expected to confer the highest  
253 reduction in re-cleavage by Cas9.<sup>8,50</sup> Two genomic loci were selected and HDR ssODN donor  
254 templates were designed to generate a single base change 3' of the PAM to serve as the desired  
255 HDR mutation. This HDR mutation would not impact Cas9 re-cleavage, as it falls outside of the  
256 protospacer/PAM sequence. In addition to the desired HDR mutation, a single blocking mutation in  
257 the seed region of the guide or PAM was included, where each position tested was changed to every  
258 possible alternate base in a unique donor template to determine if any of the four DNA bases are  
259 preferred when utilizing blocking mutations (Figure 3A). HDR ssODN donor templates were delivered  
260 along with their respective RNP complexes targeting two different genomic loci into HEK293 and  
261 K562 cells, and the rate of perfect HDR including both the desired HDR mutation and blocking  
262 mutation (where applicable) was assessed by NGS (Figure 3B). As expected, the frequency of the  
263 desired HDR mutation ('ctrl') was low, at <2% for all four conditions tested. Adding a blocking  
264 mutation in the second or third base of the 'NGG' PAM resulted in the greatest increase, with HDR  
265 levels reaching 8.0-17.8%. Blocking mutations placed around the Cas9 cleavage site and near the 3'  
266 end of the guide were also highly effective, with the impact reduced as the position of the blocking  
267 mutation moved PAM-distal. No base was universally preferred over others in these experiments.

268 Next, we aimed to determine if a single blocking mutation was sufficient to prevent re-cleavage of the  
269 genomic DNA and maximize the number of HDR events, or if a combination of multiple blocking  
270 mutations would lead to higher HDR frequency. Donor templates were designed with a single blocking  
271 mutation in the PAM, two blocking mutations in the PAM, and/or blocking mutations at two locations  
272 within the seed region. Various combinations of these mutations were delivered as ssODNs along  
273 with corresponding RNP complexes targeting four loci in Jurkat cells to assess their ability to mediate  
274 a single base change 3' of the PAM via HDR. An example sequence showing the placement of  
275 blocking mutation(s) in the donor templates tested is provided in Supplemental Figure 3A. As  
276 demonstrated by Supplemental Figure 3B, donor templates containing two blocking mutations led to  
277 more robust improvement in HDR efficiency than donor templates containing a single blocking  
278 mutation, and this effect was greatest when the blocking mutations were within the PAM or nearer to  
279 the 3' end of the guide. Incorporating three or four blocking mutations did not further enhance HDR  
280 efficiency over the best combination of 2 blocking mutations (2 PAM or 1 PAM + 1 seed A).

281 We next wanted to investigate this effect when a larger HDR mutation is inserted, such as an EcoRI  
282 restriction site, as well as examine the impact of blocking mutations when the HDR insertion was  
283 placed at various positions relative to the Cas9 cleavage site. To determine if blocking mutations are  
284 beneficial with a 6-nt insertion, we selected four gRNAs and designed donor templates to insert an  
285 EcoRI restriction digest recognition site at the Cas9 cleavage site. Donor templates included no  
286 blocking mutation (no PAM mutation) or a 'GG' to 'CC' blocking mutation within the PAM sequence  
287 (PAM mutation). In addition, donor templates to insert the EcoRI sequence at varying locations  
288 relative to the Cas9 cleavage were designed; as a result, these donor templates would facilitate the 6-  
289 nt insertion as close as 3-nt from the Cas9 cleavage site and extending as far as 45-nt in both the 5'  
290 and 3' direction. Designs of donor templates again contained no blocking mutation or a 'GG' to 'CC'  
291 PAM mutation (Supplemental Figure 3C). All donor templates consisted of the NT-strand and  
292 maintained homology arms of 40-nt from both the EcoRI insertion location and the Cas9 cut site. The  
293 set of 24-32 ssODNs for the four targets were delivered along with their respective Cas9 RNP  
294 complex to Jurkat cells by nucleofection (N = 120). Additionally, donor templates and respective Cas9  
295 RNP complexes for two of the targets were also delivered to HEK293 cells (N = 48). An EcoRI  
296 cleavage assay was used to determine the HDR frequencies, and results are shown in Supplemental  
297 Figure 3D. Mutating the PAM from an 'NGG' to 'NCC' increased HDR at locations further from the cut

298 site in the 3' direction, downstream of the PAM and outside of the protospacer sequence, where the  
299 HDR insertion would not prevent Cas9 re-cleavage. When the EcoRI insertion was within the guide  
300 seed region or PAM, incorporating additional PAM mutations negatively impacted the HDR efficiency.  
301 This suggests that there is a limit to the number of additional mutations that should be added to  
302 prevent Cas9 re-cleavage, and if too many mutations are present the HDR efficiency can be  
303 negatively affected.

304 This data represents a subset of HDR donor designs that we tested to fully elucidate a ruleset for the  
305 placement and number of blocking mutations required for various HDR mutation types. Using HDR  
306 efficiency results from Figure 3B, we generated relative HDR efficiencies (i.e., HDR efficiency with  
307 varying blocking mutations divided by HDR efficiency without blocking mutations) and a position  
308 specific scoring matrix (PSSM). The PSSM represents the HDR improvement introduced by mutating  
309 the HDR donor template at each position along the length of the Cas9 spacer sequence. Using the  
310 linear combination PSSM values representing blocking mutations in each HDR donor template, we  
311 calculated a blocking score for each of 374 donor template designs associated with 9 guides and  
312 delivered into 3 cell lines (HEK293, Jurkat, and Hepa1-6). We generated a model representing a non-  
313 linear correlation between blocking scores and HDR efficiency (Figure 3C). A score of 1.97  
314 approximately corresponds to mutating both G nucleotides in the Cas9 PAM. The model predicts  
315 blocking mutations with scores <1.97 will have a positive impact on HDR rates; while blocking  
316 mutations with scores greater than 1.97 have a less certain, and perhaps detrimental, impact.

317 We embedded the PSSM, blocking score model, a guide-to-target mutation model, and other  
318 heuristics in the Alt-R HDR Design Tool. The combination of models allows the tool to recommend  
319 high quality paired HDR donor templates and guides. In addition, the Alt-R HDR Design Tool uses  
320 blocking scores to select block mutations that do not change the protein coding sequence (when  
321 transcript information is provided). We tested the Alt-R HDR Design Tool's donor template  
322 recommendations using four unique target HDR mutations with or without the addition of silent  
323 blocking mutations (Figure 3D), and we delivered the donor templates to HEK293, HeLa and Jurkat  
324 cells. In every case except one in Jurkat cells, where the HDR rate was unchanged, the donor  
325 template designed with the addition of silent mutations yielded higher HDR events than donor  
326 template designs without blocking silent mutations (Figure 3E).

327

## 328 HDR mutation location determines donor strand preference

329 Achieving efficient HDR at greater distances from the cut site using WT Cas9 to broaden the  
330 capabilities of CRISPR genome editing is desirable. We aimed to investigate design considerations  
331 for HDR mutations that fall outside of the optimal editing window to determine if there is a donor  
332 strand preference. Additionally, we tested if additional mutations along the ssODN repair track, which  
333 is defined as the portion of the donor template between the Cas9 cut site and mutation location, were  
334 beneficial. We designed ssODN donor templates to create an EcoRI insert 25-nt from the Cas9  
335 cleavage site either on the PAM-containing side of the Cas9 cut (PAM-proximal) or on the non-PAM  
336 side of the Cas9 cut (PAM-distal) for three genomic loci. Donor templates were designed to have 1)  
337 no mutation, 2) an 'NGG' to 'NCC' PAM mutation to prevent re-cleavage after HDR, or 3) mutations  
338 placed along the repair track every 5<sup>th</sup> nt, either alone or in combination with the PAM mutations  
339 (Figure 4A). Both the T and NT strands were tested to determine which donor templates facilitated the  
340 highest HDR incorporation of an insert outside of the previously established optimal placement.  
341 ssODN donor templates were delivered along with their respective Cas9 RNP complexes to HeLa  
342 cells by nucleofection, and the frequency of perfect HDR containing both the desired HDR mutation  
343 and any additional mutations was determined by NGS. The mean HDR rate for each ssODN design  
344 across three biological replicates for each of the three genomic loci tested is shown in Figure 4B (for  
345 each ssODN design n = 9). For PAM-distal insertions, the NT strand had an average HDR of 12.7%  
346 with repair track mutations compared to 1.6% when the T strand was used. In contrast, for PAM-  
347 proximal insertions, the T strand containing repair track and PAM mutations gave higher HDR than  
348 the NT strand with the same mutations (8.6% vs 0.8%, respectively). For PAM-proximal insertions, the  
349 repair track mutations marginally improved the HDR efficiency above incorporating a PAM mutation  
350 alone, increasing the HDR from 7.5% to 8.6%. However, for PAM-distal insertions, the repair track  
351 mutations significantly improved the frequency of HDR 3.4-fold over having only a PAM mutation (p  
352 <0.01, paired t-test).

353 To further investigate strand preference when HDR mutations are placed at suboptimal distances  
354 (>15-nt) away from the Cas9 cleavage site, 12 loci from the set of 254 targets presented in Figure 1B  
355 were selected as a subset of gRNAs to carry out this experiment. These gRNAs were selected as  
356 sites for HDR because they demonstrated one of three characteristics: no strand preference, an  
357 obvious strand preference for the T strand, or an obvious strand preference for the NT strand in either

358 Jurkat or HAP1 cells. Donor templates were designed following the same principles as the prior  
359 experiment, placing an EcoRI insertion at the Cas9 cleavage site or 20 bases PAM-proximal or PAM-  
360 distal. Given the results shown in Figure 4B that identify PAM-distal insertions as mediating sub-  
361 optimal insertion frequencies, a single PAM mutation alone was only tested for PAM-proximal  
362 insertions. In addition, repair track mutations were incorporated every 3-7 nt between the Cas9  
363 cleavage site and the desired HDR mutation (Figure 4C). These ssODN donor templates were  
364 delivered to Jurkat and HeLa cells along with their respective Cas9 RNP complexes by nucleofection,  
365 and the frequency of perfect HDR was determined by NGS with the mean HDR rate for each ssODN  
366 across the 12 genomic loci shown in Figure 4D. Across all 12 sites tested, the NT strand gave higher  
367 HDR than the T strand for PAM-distal insertions, and the T strand gave higher HDR than the NT  
368 strand for PAM-proximal insertions (Figure 4D, Supplemental Figure 4A). Similar to the previous  
369 experiment, repair track mutations in combination with a single PAM mutation for PAM-proximal  
370 insertions had a modest improvement in HDR rates over the single PAM mutation alone, increasing  
371 from 3.0% to 4.9% in Jurkat cells and 5.4% to 8.7% in HeLa cells. The level of HDR improvement for  
372 the various mutation strategies had site-to-site variability (Supplemental Figure 4B). However, the  
373 strand preference was universal to all sites tested, indicating that for PAM-proximal insertions the T  
374 strand should be used as the donor template, and for PAM-distal insertions, the NT strand should be  
375 used for the highest rate of HDR.

376

### 377 **Optimized design rules for HDR with Cas12a**

378 Cas12a is a type II CRISPR-Cas nuclease with several distinct differences to Cas9. Cas12a  
379 generates a DSB with 5' overhangs, requires a 'TTTV' PAM, and enables editing in AT-rich  
380 genomes.<sup>4</sup> We designed experiments to characterize HDR design rules for Cas12a in a manner  
381 similar to what was done with Cas9. First, the optimal placement of an insertion was determined by  
382 designing donor templates for five sites in the *HPRT1* gene. These donor templates placed an EcoRI  
383 restriction digest recognition site at varying positions relative to the PAM and guide sequence (Figure  
384 5A), ranging from 9 bases away in the 5' direction from the first base of the guide to 45 bases 3' of the  
385 first base of the guide. The optimal HDR activity for this insert is not centered around the two Cas12a  
386 cleavage sites, canonically positioned 18 and 23 bases from the PAM, as was the case for Cas9.  
387 There is a strong preference for insertions between positions 12-16 of the guide (Figure 5B).

388 Interestingly, there is an increase in EcoRI insertion around position 24 even though this position falls  
389 outside of the protospacer region. We hypothesized this to be a result of imperfect HDR where an  
390 EcoRI site is inserted via HDR, followed by Cas12a re-cleavage which then allows the insertion of  
391 other indels from NHEJ repair. To investigate this possibility, we performed NGS analysis of one of  
392 the five sites from Figure 5B to examine the frequency of perfect HDR insertion relative to imperfect  
393 HDR insertion. At position 24, while the amount of EcoRI insertion was 6.4% by EcoRI cleavage  
394 (Supplemental Figure 5A), the amount of perfect HDR when measured by NGS is <1% and the  
395 imperfect HDR, which includes HDR insertion of an EcoRI site plus subsequent indels from NHEJ due  
396 to Cas12a re-cleavage, was 5.9% (Supplemental Figure 5B). Thus, we confirmed by NGS that the  
397 optimal position for Cas12a-mediated HDR is between positions 12-16 of the guide and moving an  
398 insertion outside of the protospacer can give the desired insertion, but also allows for additional  
399 undesired editing.

400 To investigate if Cas12a demonstrates a universal strand preference when an EcoRI insertion was  
401 optimally placed, a set of 15 Cas12a guide RNAs was selected and donor templates were designed to  
402 insert an EcoRI restriction digest recognition site 16 bases 3' of the PAM. Both the T and NT strand  
403 ssODN donor templates were delivered with their respective RNP complexes to Jurkat and HAP1  
404 cells by nucleofection, and NGS was used to measure the frequency of total editing and perfect HDR.  
405 The combined results from the fifteen sites comparing T and NT strand donors in two cell lines is  
406 shown in Figure 5C. Although there are differences in total editing across the 15 sites tested (varying  
407 from 30% to >95% total editing which indicates inherent, guide or locus-dependent editing outcomes),  
408 universally the total editing was lower when the T strand was used. This is shown in figure 5C, top  
409 panel by the data points generally clustering below the line through the origin or showing increased  
410 total editing when delivered with the NT strand. The reference line through the origin is included as a  
411 benchmark in both panels for 5C to indicate the point at which T strand total editing or HDR is  
412 equivalent to NT strand total editing or HDR, respectively. As a result of the discrepancy observed in  
413 favor of the NT strand mediating increased total editing (top panel of 5C), the frequency of HDR was  
414 also lower when the T strand was used as the donor template than when the NT strand was used.  
415 These results demonstrate a statistically significant preference for the use of the NT strand as the  
416 donor template to achieve optimal results in HDR experiments using Cas12a nuclease.

417 The results from Figure 5B and follow-up in Supplemental Figure 5B suggest that blocking mutations  
418 could also be beneficial in Cas12a-mediated HDR. We designed experiments to investigate whether  
419 HDR could be improved at a position outside of the guide targeting sequence by incorporating  
420 blocking mutations within the ssODN donor template. Donor templates with an EcoRI insertion  
421 optimally placed at position 15 of the guide, or sub-optimally at position 24 from the first base of the  
422 guide (outside of the guide targeting region) were designed to include no blocking mutation, a  
423 blocking mutation of the PAM sequence (TTTV to TVTV), or a blocking mutation within the guide  
424 targeting sequence at various positions (Figure 5D). These were tested as NT strand donor templates  
425 at two genomic loci within the *HPRT1* gene and in two cell lines, Jurkat and HeLa. When the EcoRI  
426 cleavage site was inserted within the guide sequence there was no benefit to including blocking  
427 mutations to prevent further re-cleavage, likely because the EcoRI site disrupts subsequent cleavage  
428 events (Fig 5E, left panel). However, when the EcoRI insertion was outside of the PAM/guide  
429 targeting region, blocking mutations increased the rate of HDR from 0.7%, to 13.3% with a mutation in  
430 the PAM and 13.0% with a mutation at position 14 of the guide (Figure 5E, right panel). These results  
431 show that, similar to Cas9, blocking mutations are beneficial with Cas12a and can be used to broaden  
432 the available window for efficient HDR insertions.

433

#### 434 **Alt-R modified HDR Donor oligos and Alt-R HDR Enhancer reagents further improve HDR**

435 It has been previously reported that the addition of phosphorothioate (PS) modifications improve HDR  
436 efficiency.<sup>39,46</sup> We investigated over 20 different stabilizing modifications (data not shown) and have  
437 developed Alt-R HDR Donor Oligos which include 2 PS linkages at the ultimate and penultimate  
438 backbone linkage and an end-blocking modification at both the 5' and 3' end to provide increased  
439 stability. We designed 7 donor templates to insert a 6-nt EcoRI site with 30 to 40-nt homology arms at  
440 unique genomic loci, and 1 donor template designed to insert a 42-nt sequence with 60-nt homology  
441 arms. These contained either no modification (unmodified), two PS linkages at each end of the donor  
442 template (PS modified) or Alt-R modified donor templates. They were delivered to HeLa cells by  
443 nucleofection along with corresponding RNP complexes consisting of sgRNAs complexed with Alt-R  
444 *S.p.* HiFi Cas9 nuclease. PS modified donor templates confer improved HDR over unmodified donor  
445 templates, with an average of 3.1-fold improvement (Figure 6A). Alt-R modifications provided further

446 increase in HDR over both unmodified and PS modified donor templates by an average of 5.2-fold  
447 and 1.7-fold, respectively.

448 Another strategy to increase HDR is to add chemical compounds that inhibit NHEJ repair and  
449 promote HDR repair.<sup>47-49</sup> We tested two commercially available compounds, Alt-R HDR Enhancer V1  
450 and Alt-R HDR Enhancer V2, for their ability to promote HDR. Four genomic loci for Cas9 and four  
451 genomic loci for Cas12a were selected and Alt-R modified donor templates containing 40-nt  
452 homology arms were designed to insert an EcoRI cleavage site at the optimal position (at the Cas9  
453 cleavage site or at position 16 of the Cas12a guide). After standard delivery of ssODNs with gRNAs  
454 via lipofection (HEK293-Cas9 cells, which stably express Cas9 nuclease) or ssODNs with RNP  
455 complexes by nucleofection (K562, Jurkat) cells were plated in media containing HDR Enhancer V1,  
456 HDR Enhancer V2, DMSO, or untreated (data not shown), with a media change after 24 hours to  
457 standard media. With Cas9, HDR Enhancer V1 increased HDR frequencies by 1.5-, 1.6-, and 2.1-fold  
458 in HEK293-Cas9, K562, and Jurkat cells, respectively. With Cas12a delivery, HDR Enhancer V1  
459 increased HDR frequencies 1.6, and 1.1-fold in K562 and Jurkat cells, respectively. With Cas9, HDR  
460 Enhancer V2 increased HDR frequencies 2.2-, 1.9-, and 3.2-fold in HEK293-Cas9, K562, and Jurkat  
461 cells, respectively. With Cas12a delivery, HDR Enhancer V2 increased HDR frequencies 1.7- and 1.9-  
462 fold in K562 and Jurkat cells, respectively (Figure 6B).

463 Finally, we investigated if the use Alt-R HDR Enhancer V1 in combination with modified donor  
464 templates improved HDR further than if just one of these reagents was used. In this experiment Alt-R  
465 HDR Enhancer V1 was used, although we have observed similar results with Alt-R HDR Enhancer V2  
466 (data not shown). We found that the maximal HDR efficiency was achieved when Alt-R modified HDR  
467 donor templates were used and cells were incubated with Alt-R HDR Enhancer V1 (Figure 6C). The  
468 donor templates targeting *HPRT1* had 5.9% HDR using an unmodified DNA donor template, which  
469 was increased 4.8-fold to 28.4% using an Alt-R modified donor template. The addition of Alt-R HDR  
470 Enhancer V1 further increased the frequency of HDR 1.8-fold to 52.0%. Similarly, HDR at the *MYC*  
471 locus increased from 15% HDR using an unmodified donor template to 57.5% HDR with the  
472 combined use of an Alt-R modified donor template and Alt-R HDR Enhancer V1. The same was true  
473 for *SAA1*, which had HDR frequency of 4.1% with an unmodified donor template, 18.5% with an Alt-R  
474 modified donor template, and 39.4% HDR with the combination of Alt-R modified donor template and  
475 Alt-R HDR Enhancer V1, an overall increase of 9.6-fold.



476

477 **DISCUSSION**

478 ssODN donor templates are routinely used to generate mutations or small insertions with CRISPR-  
479 Cas proteins. This is desirable for many applications including the generation of functional domains  
480 such as epitope tags or fluorescent proteins fused to endogenous genes for biological studies,  
481 creation of cell lines with a known mutation for disease modeling, and correction of a genetic disease  
482 for therapeutic applications.<sup>36,51,52</sup> However, the design of these donor templates remains challenging  
483 for researchers due to uncertainty about which CRISPR-Cas system should be applied, selection of  
484 gRNA(s) for each new HDR mutation location, and which donor template strand should be used to  
485 achieve the highest frequency of HDR. In addition, the design process for ssODN donors can be time-  
486 consuming, particularly if the researcher wishes to add silent blocking mutations to prevent re-  
487 cleavage and maintain amino acid translation. We have thoroughly investigated design considerations  
488 for *S.p.* Cas9 nuclease, *S.p.* Cas9 D10A nickase and *A.s.* Cas12a nuclease and present optimized  
489 design considerations for each enzyme, including positioning of the gRNA(s) relative to the desired  
490 mutation, donor strand preference, and the incorporation of blocking mutations to improve desired  
491 HDR. Additionally, we have identified donor template chemical modifications and small molecule  
492 compounds that further increase rates of HDR.

493 When starting an HDR genome editing project the first consideration is which CRISPR-Cas enzyme to  
494 utilize. Our results support that this choice should be dependent on where the relative genomic  
495 location of the desired mutation(s) resides in relation to the available CRISPR-Cas guides. If there is  
496 an 'NGG' PAM near the desired mutation (<15 bases), and this guide is expected or known to edit  
497 efficiently, then WT Cas9 can be used with confidence. If the available 'NGG' PAM sites are greater  
498 than 15 bases from the desired mutation, then the use of a PAM-out paired guide design with Cas9  
499 D10A nickase may confer higher HDR than WT Cas9, provided the mutation is placed between the  
500 two nick sites generated by Cas9 D10A. This can be particularly useful if additional blocking  
501 mutations are not desired or off-target DSBs are a concern. Alternatively, if there is a 'TTTV' PAM site  
502 that is positioned so the HDR mutation lies between the 12-16<sup>th</sup> bases of a Cas12a protospacer, then  
503 Cas12a is a viable option, although, like *S.p.* Cas9, this window can be extended with the  
504 incorporation of blocking mutations. When multiple gRNA options are available for a desired HDR

505 edit, screening several may help eliminate any low activity guides to determine which will yield the  
506 highest HDR.

507 The availability of efficient Cas9 guides near a desired mutation is a significant limitation for many  
508 HDR experiments. In many cases, the guide or guides closest to the desired HDR mutation are sub-  
509 optimal in terms of cleavage efficiency or proximity. While using a paired-guide nickase strategy is  
510 viable, the requirement of having two guides with optimal spacing, activity, and orientation limits the  
511 design options and precludes this strategy for certain sites where there are no nickase designs  
512 available. Paix et al.<sup>44</sup> demonstrated that incorporating additional mutations in the repair track  
513 between the cut site and desired HDR mutation location facilitated a wider region of donor integration.  
514 We observed this to be beneficial for PAM-distal HDR events. However, repair track mutations in  
515 combination with PAM mutations did not yield the highest HDR. This is likely because the repair track  
516 mutations were sufficient to prevent Cas9 re-cleavage without additional mutations in the PAM and  
517 the PAM mutation is on the opposite side of the Cas9 cleavage event, which may fall outside of the  
518 effective conversion zone for SDSA repair.<sup>38</sup> For PAM-proximal HDR mutations, repair track mutations  
519 were beneficial for some sites, but not all, indicating that this strategy is effective in certain cases. In  
520 situations where optimally spaced Cas9 or Cas12a guide designs are not possible, incorporating  
521 mutations within the repair track between the cut site and desired HDR mutation or within the PAM  
522 may improve the rate of successful HDR.

523 The addition of blocking mutations has been demonstrated to improve HDR depending on the  
524 selected guide RNA and its relative positioning to the desired HDR mutation. Blocking mutations are  
525 beneficial when the desired HDR mutation does not prevent re-cleavage by the CRISPR-Cas  
526 nuclease. We have optimized the design of blocking mutations for use with Cas9 nuclease, including  
527 the placement and number of blocking mutations required, and this has been built into the Alt-R HDR  
528 Design Tool which facilitates simple donor template design in an easy to navigate interface. The Alt-R  
529 HDR Design Tool allows for gRNA selection for both WT Cas9, balancing the distance from the cut to  
530 mutation and on- and off-target scores of available gRNAs, and Cas9 D10A nickase, where the gRNA  
531 orientation and distance between nick sites is considered. In addition, the Alt-R HDR Design Tool  
532 provides the option to add silent blocking mutations using our empirically defined ruleset. In our study,  
533 we identified no bias in which alternate base was used as the blocking mutation to prevent Cas9 re-  
534 cleavage, indicating that there is flexibility in designing appropriate silent blocking mutations so as to

535 not affect coding sequence. However, this could also indicate that the effect size is small or site-  
536 specific and with a larger data set potential differences between alternate bases used for silent  
537 blocking mutations could be resolved. Further investigation into the optimized number and placement  
538 of blocking mutations with Cas12a is underway with the expectation that this will be built into a tool for  
539 Cas12a HDR donor template design.

540 After a CRISPR-Cas system and gRNA(s) have been selected and the donor template has been  
541 designed, the next consideration for HDR experiments is the selection of homology arm lengths. In  
542 previous work investigating HDR improvements in the cell lines mentioned above, asymmetric  
543 homology arms did not improve HDR beyond symmetric homology arms when arm length was  $\geq 30$ -nt  
544 from both the mutation location and the Cas9 cleavage site (data not shown). As such, the standard  
545 approach we employ is to design ssODN donor templates with 40-nt homology arms. The Alt-R HDR  
546 Design Tool allows for custom homology arm lengths to accommodate asymmetric designs, if desired.  
547 A final donor template design consideration that we investigated was strand preference for the donor  
548 template. Cas9 D10A nickase did not demonstrate a strong strand preference, so testing both strands  
549 to determine which results in the highest HDR frequency may be prudent. However, for WT Cas9 the  
550 preferred strand is strongly dependent upon where the desired HDR mutation is, relative to the Cas9  
551 gRNA. Previous reports have demonstrated that when using ssODN donor templates with Cas9  
552 nuclease the SDSA mechanism of repair is preferentially utilized, which consists of two steps.<sup>38</sup> After  
553 a DSB is generated, the ends are resected, generating 3' overhangs which are then available for base  
554 pairing with the donor DNA. This donor DNA then serves as a template for 5' to 3' DNA synthesis.  
555 Although we observed no universal donor strand preference in the experiment outlined in Figure 1B,  
556 the HDR insertion was placed directly at the Cas9 cleavage site where the SDSA model predicts high  
557 relative HDR regardless of the donor strand used. However, for insertions further from the Cas9  
558 cleavage site there is a preference for the donor strand that contains 3' sequence complementary to  
559 the overhangs generated during DSB repair.<sup>44</sup> For PAM-proximal insertions the T strand should be  
560 used, and for PAM-distal mutations the NT strand should be used, consistent with the SDSA model of  
561 DSB repair using ssODN donor templates. For mutations directly at the cut site, we provide some  
562 evidence that the use of the T strand may reduce total editing with Cas9 which negatively impacts  
563 HDR, but this was not the case for both cell types tested. Using Cas12a, we observed a reduction in  
564 total editing rates when the T strand was used universally. We hypothesize that the donor template

565 acts as a sponge for RNP, reducing the concentration available for genome editing within cells, or  
566 activates the non-specific ssDNase activity of Cas12a. The NT strand conferred increased HDR for  
567 experiments with Cas12a over the T strand. However, the effect of HDR insertion placement has not  
568 been thoroughly investigated for Cas12a to determine if the T strand will be advantageous over the  
569 NT strand for PAM-proximal mutations in a manner similar to Cas9 and further experimentation is  
570 required.

571 Beyond donor template design considerations, the use of optimized reagents for HDR experiments  
572 can further improve the frequency of HDR-mediated repair. The use of end-protecting modifications to  
573 stabilize ssODN donor templates within the cellular environment has been demonstrated to improve  
574 HDR rates, and we have developed a novel end-blocking modification that confers the highest level of  
575 improvement over unmodified DNA templates, compared to previously reported constructs. Further,  
576 we have identified two small molecules that can be used to inhibit the NHEJ pathway to improve HDR  
577 over untreated cells. We have demonstrated that when incorporated into our workflows these  
578 compounds improve HDR up to 3.2-fold in immortalized cell lines and function in combination with  
579 modified donor templates to provide further improvements in HDR frequencies. We have studied  
580 design rules for *A.s.* Cas12a nuclease, which had not yet been systematically examined. Further, the  
581 ruleset for *S.p.* Cas9 and *S.p.* Cas9 D10A nickase have been incorporated into a novel bioinformatic  
582 tool for HDR donor template design. Taken altogether, these findings present design  
583 recommendations and optimized reagents for achieving high frequency of precise repair outcomes  
584 utilizing HDR in mammalian cell lines.

585

## 586 **METHODS**

### 587 **Ribonucleoprotein complex formation**

588 Cas9 gRNAs were prepared by mixing equimolar amounts of Alt-R™ crRNA and Alt-R tracrRNA  
589 (Integrated DNA Technologies, Coralville, IA, USA) in IDT Duplex Buffer (30 mM HEPES, pH 7.5, 100  
590 mM potassium acetate; Integrated DNA Technologies), heating to 95°C and slowly cooling to room  
591 temperature or using Alt-R sgRNA (Integrated DNA Technologies) hydrated in IDTE pH 7.5 (10 mM  
592 Tris, pH 7.5, 0.1 mM EDTA; Integrated DNA Technologies). Cas12a gRNAs consisted of Alt-R  
593 Cas12a crRNAs (Integrated DNA Technologies) hydrated in IDTE pH 7.5. RNP complexes were  
594 assembled by combining the CRISPR-Cas nuclease (Alt-R *S.p.* Cas9 Nuclease V3, Alt-R *S.p.* HiFi

595 Cas9 Nuclease V3, Alt-R *S.p.* Cas9 D10A V3, Alt-R *S.p.* Cas9 H840A V3, Alt-R *A.s.* Cas12a V3, or  
596 Alt-R *A.s.* Cas12a *Ultra*; Integrated DNA Technologies) and the Alt-R gRNA at a 1:1 to 1.2:1 molar  
597 ratio of gRNA:protein and incubating at room temperature for 30 minutes. For paired nicking  
598 experiments, each RNP was formed separately, and two RNPs were mixed together at an equal  
599 molar ratio prior to adding to the cells at the time of transfection. The 20-nt target specific sequences  
600 of the gRNAs used in this study are listed in Supplementary Table 1.

601

#### 602 **HDR ssODN donor templates**

603 Alt-R™ HDR Donor Oligos (Integrated DNA Technologies) used in this study consisted of either Alt-R  
604 modified (containing two phosphorothioate linkages at the ultimate and penultimate backbone linkage  
605 and an IDT proprietary end-blocking modification at 5' and 3' ends), PS modified (containing two  
606 phosphorothioate linkages at the ultimate and penultimate backbone linkage at 5' and 3' ends) or  
607 unmodified DNA. Donor oligos were hydrated using IDTE pH 7.5 (Integrated DNA Technologies).  
608 Sequences of the HDR oligos used in this study are listed in Supplementary Table 1.

609

#### 610 **Cell culture**

611 HAP1, HEK293, HeLa, Jurkat E6-1, and K562 cells were purchased from ATCC® (Manassas, VA,  
612 USA), and maintained in DMEM (HEK293, and HeLa), RPMI-1640 (Jurkat) and IMDM (HAP1, K562)  
613 (ATCC), each supplemented with 10% fetal bovine serum (FBS) and 1% penicillin-streptomycin  
614 (Thermo Fisher Scientific, Carlsbad, CA, USA). HEK293 cells that constitutively express Cas9  
615 nuclease ("HEK293-Cas9") were generated by stable integration of a human-codon optimized *S.p.*  
616 Cas9 as well as the flanking 5' and 3' nuclear localizing sequences and 5'-V5 tag from the GeneArt  
617 CRISPR Nuclease Vector (Thermo Fisher Scientific). HEK293-Cas9 cells were maintained in DMEM  
618 supplemented with 10% FBS, 1% penicillin-streptomycin, and 500 µg/mL G418 (Thermo Fisher  
619 Scientific). Cells were incubated at 37°C with 5% CO<sub>2</sub> and passaged every 3 days. HAP1 cells were  
620 used for transfection at 50-70% confluency. HEK293 and HeLa cells were used for transfection at 70-  
621 90% confluency. Jurkat and K562 were used for transfection at 5-8 x 10<sup>5</sup> cells/mL density. After  
622 transfection, cells were grown for 48-72 hours in total, after which genomic DNA was isolated using  
623 QuickExtract™ DNA Extraction Solution (Epicentre, Madison, WI, USA).

624

625 **Delivery of genome editing reagents by lipofection**

626 Lipofection was performed in 96-well plates. First, 25  $\mu\text{L}$  of Opti-MEM<sup>®</sup> (Thermo Fisher Scientific)  
627 containing 1.2  $\mu\text{L}$  (RNP delivery) or 0.75  $\mu\text{L}$  (gRNA delivery) of Lipofectamine<sup>®</sup> RNAiMAX (Thermo  
628 Fisher Scientific) was combined with equal volume of Opti-MEM containing RNP or gRNA and HDR  
629 donor template (when present), and incubated at room temperature for 20 min. After lipoplex  
630 formation,  $4.5 \times 10^4$  cells resuspended in 100  $\mu\text{L}$  of DMEM + 10% FBS were added to the transfection  
631 complex which resulted in a final concentration of 10 nM RNP or gRNA and 3 nM HDR oligo on a per-  
632 well basis. Transfection plates were incubated at 37°C and 5% CO<sub>2</sub>.

633

634 **Delivery of genome editing reagents by nucleofection**

635 Electroporation was performed using the Lonza<sup>™</sup> Nucleofector<sup>™</sup> 96-well Shuttle<sup>™</sup> System (Lonza,  
636 Basel, Switzerland). For each nucleofection, cells were washed with 1X phosphate buffered saline  
637 (PBS) and resuspended in 20  $\mu\text{L}$  of solution SF or SE (Lonza). Cell suspensions were combined with  
638 RNP complex(es), Alt-R Cas9 or Cpf1 (Cas12a) Electroporation Enhancer (Integrated DNA  
639 Technologies) and HDR donor template (if applicable). This mixture was transferred into one well of a  
640 Nucleocuvette<sup>™</sup> Plate (Lonza) and electroporated using manufacturer's recommended protocols  
641 (except for HEK293, which used protocol 96-DS-150). After nucleofection, 75  $\mu\text{L}$  pre-warmed culture  
642 media was added to the cell mixture in the cuvette, mixed by pipetting, and 25  $\mu\text{L}$  was transferred to a  
643 96-well culture plate with 175  $\mu\text{L}$  pre-warmed culture media. Transfection plates were incubated at  
644 37°C and 5% CO<sub>2</sub>.

645

646 **Addition of Alt-R HDR Enhancer**

647 For experiments using HDR Enhancer, cells were transfected as described. Immediately following  
648 transfection, cells were grown in media containing either DMSO as a vehicle control, Alt-R<sup>™</sup> HDR  
649 Enhancer V1 at a final concentration of 30  $\mu\text{M}$ , or Alt-R HDR Enhancer V2 at a final concentration of 1  
650  $\mu\text{M}$ . 24 hours after transfection, media was aspirated away without disturbing the cells and fresh  
651 media was added to each well.

652

653 **T7 Endonuclease I (T7EI) Assay and restriction enzyme digestion**

654 Genomic DNA was extracted after 48-72 hrs incubation using 50 µL Quick Extract™ DNA Extraction  
655 Solution (Lucigen, Middleton, WI, USA) following the manufacturer's protocol. Genomic DNA was  
656 diluted 3-fold with nuclease-free water and 1.5 µL was PCR-amplified using 0.15 U KAPA HiFi  
657 HotStart DNA Polymerase (Kapa Biosystems, Wilmington, MA, USA) in a final volume of 10 µL. For  
658 HDR analysis using restriction enzyme digestion, 10 µL of the PCR product was incubated with 2 U of  
659 EcoRI-HF® in 1X CutSmart® Buffer (New England BioLabs, Ipswich, MA, USA) at 37°C for 60  
660 minutes. Total editing rate was measured using the Alt-R™ Genome Editing Detection Kit (T7EI)  
661 (Integrated DNA Technologies) following the manufacturer's protocol. Cleavage products were  
662 separated on the Fragment Analyzer™ using the CRISPR Mutation Discovery Kit (Agilent  
663 Technologies, Santa Clara, CA, USA). Editing and HDR frequencies were calculated using the  
664 following formula: average molar concentration of the cut products / (average molar concentration of  
665 the cut products + molar concentration of the uncut product) x 100. PCR primers are listed in  
666 Supplementary Table 1.

667

#### 668 **Quantification of editing events by next-generation sequencing (NGS)**

669 On-target editing and HDR efficiencies were also measured by NGS. Libraries were prepared using  
670 an amplification-based method as described previously<sup>53</sup>. In short, the first round of PCR was  
671 performed using target specific primers, and the second round of PCR incorporates P5 and P7  
672 Illumina adapters to the ends of the amplicons for universal amplification. Libraries were purified using  
673 Agencourt® AMPure® XP system (Beckman Coulter, Brea, CA, USA), and quantified with qPCR  
674 before loading onto the Illumina® MiSeq platform (Illumina, San Diego, CA, USA). Paired end, 150 bp  
675 reads were sequenced using V2 chemistry. Data were analyzed using a custom-built pipeline. Data  
676 was demultiplexed using Picard tools v2.9 (<https://github.com/broadinstitute/picard>). Forward and  
677 reverse reads were merged into extended amplicons (flash v1.2.11)<sup>54</sup> before being aligned against  
678 the GRCh38 genomic reference (minimap2 v2.12).<sup>55</sup> Reads were aligned to the target, favoring  
679 alignment choices with indels near the predicted cut site(s). At each target, editing was calculated as  
680 the percentage of total reads containing an indel within an 8bp window of the cut site for Cas9 or a  
681 9bp window from the -3 position of the Cas12a PAM distal cut site. PCR primers are listed in  
682 Supplementary Table 1.

683

684 **Statistical Analysis**

685 The data collected from experiments were analysed on Graph PadPrism 8 using two-tailed unpaired t-  
686 test to evaluate significance (\*p < 0.05, \*\*p < 0.01, \*\*\*p < 0.001, and \*\*\*\*p < 0.0001).

687

688 **DATA AVAILABILITY**

689 The Alt-R HDR Design Tool is a free online tool that is available from the Integrated DNA  
690 Technologies website (<https://www.idtdna.com/pages/tools/alt-r-crispr-hdr-design-tool>). NGS data  
691 used for the figures and supplementary figures have been made available at SRA BioProject  
692 Accession # PRJNA638623.

693

694 **ACKNOWLEDGEMENTS**

695 The authors thank Ashley Jacobi and Kim Lennox for editing the manuscript. This work was  
696 supported by internal funds from Integrated DNA Technologies, Inc. The authors are employed by  
697 Integrated DNA Technologies, Inc., (IDT) which offers reagents for sale similar to some of the  
698 compounds described in the manuscript. GRR owns equity in DHR, the parent company of IDT.

699

700 **AUTHOR CONTRIBUTIONS**

701 Conceptualization, M.S.S, B.T., J.W., R.T., S.Y., M.S.M. and G.R.R; Software, G.K. and M.S.M.;  
702 Investigation, M.S.S., B.T., J.W., R.T. and S.Y.; Data Curation, M.S.S. and M.S.M.; Writing-Original  
703 Draft, M.S.S.; Writing-Review & Editing, M.S.S., B.T., J.W., R.T., S.Y., G.K., M.S.M. and G.R.R.;  
704 Supervision: G.R.R.

705

706 **REFERENCES**

- 707 1 Cong, L. *et al.* Multiplex genome engineering using CRISPR/Cas systems. *Science* **339**, 819-  
708 823, doi:10.1126/science.1231143 (2013).
- 709 2 Mali, P. *et al.* RNA-guided human genome engineering via Cas9. *Science* **339**, 823-826,  
710 doi:10.1126/science.1232033 (2013).
- 711 3 Wang, H., La Russa, M. & Qi, L. S. CRISPR/Cas9 in Genome Editing and Beyond. *Annual review*  
712 *of biochemistry* **85**, 227-264, doi:10.1146/annurev-biochem-060815-014607 (2016).



- 713 4 Zetsche, B. *et al.* Cpf1 is a single RNA-guided endonuclease of a class 2 CRISPR-Cas system.  
714 *Cell* **163**, 759-771, doi:10.1016/j.cell.2015.09.038 (2015).
- 715 5 Hur, J. K. *et al.* Targeted mutagenesis in mice by electroporation of Cpf1 ribonucleoproteins.  
716 *Nature biotechnology*, doi:10.1038/nbt.3596 (2016).
- 717 6 Deltcheva, E. *et al.* CRISPR RNA maturation by trans-encoded small RNA and host factor  
718 RNase III. *Nature* **471**, 602-607, doi:10.1038/nature09886 (2011).
- 719 7 Jinek, M. *et al.* A programmable dual-RNA-guided DNA endonuclease in adaptive bacterial  
720 immunity. *Science* **337**, 816-821, doi:10.1126/science.1225829 (2012).
- 721 8 Jiang, F. & Doudna, J. A. CRISPR-Cas9 Structures and Mechanisms. *Annu Rev Biophys* **46**, 505-  
722 529, doi:10.1146/annurev-biophys-062215-010822 (2017).
- 723 9 Kim, S., Kim, D., Cho, S. W., Kim, J. & Kim, J. S. Highly efficient RNA-guided genome editing in  
724 human cells via delivery of purified Cas9 ribonucleoproteins. *Genome research* **24**, 1012-  
725 1019, doi:10.1101/gr.171322.113 (2014).
- 726 10 Anders, C. & Jinek, M. In vitro enzymology of Cas9. *Methods in enzymology* **546**, 1-20,  
727 doi:10.1016/B978-0-12-801185-0.00001-5 (2014).
- 728 11 Liang, X. *et al.* Rapid and highly efficient mammalian cell engineering via Cas9 protein  
729 transfection. *Journal of biotechnology* **208**, 44-53, doi:10.1016/j.jbiotec.2015.04.024 (2015).
- 730 12 Liang, Z. *et al.* Efficient DNA-free genome editing of bread wheat using CRISPR/Cas9  
731 ribonucleoprotein complexes. *Nat Commun* **8**, 14261, doi:10.1038/ncomms14261 (2017).
- 732 13 Hendel, A. *et al.* Chemically modified guide RNAs enhance CRISPR-Cas genome editing in  
733 human primary cells. *Nature biotechnology* **33**, 985-989, doi:10.1038/nbt.3290 (2015).
- 734 14 Mekler, V., Minakhin, L., Semenova, E., Kuznedelov, K. & Severinov, K. Kinetics of the CRISPR-  
735 Cas9 effector complex assembly and the role of 3'-terminal segment of guide RNA. *Nucleic  
736 Acids Res* **44**, 2837-2845, doi:10.1093/nar/gkw138 (2016).

- 737 15 Davis, L. & Maizels, N. Homology-directed repair of DNA nicks via pathways distinct from  
738 canonical double-strand break repair. *Proc Natl Acad Sci U S A* **111**, E924-932,  
739 doi:10.1073/pnas.1400236111 (2014).
- 740 16 Chen, X. *et al.* In trans paired nicking triggers seamless genome editing without double-  
741 stranded DNA cutting. *Nat Commun* **8**, 657, doi:10.1038/s41467-017-00687-1 (2017).
- 742 17 Ran, F. A. *et al.* Double nicking by RNA-guided CRISPR Cas9 for enhanced genome editing  
743 specificity. *Cell* **154**, 1380-1389, doi:10.1016/j.cell.2013.08.021 (2013).
- 744 18 Kocher, T. *et al.* Cut and Paste: Efficient Homology-Directed Repair of a Dominant Negative  
745 KRT14 Mutation via CRISPR/Cas9 Nickases. *Mol Ther* **25**, 2585-2598,  
746 doi:10.1016/j.ymthe.2017.08.015 (2017).
- 747 19 Cho, S. W. *et al.* Analysis of off-target effects of CRISPR/Cas-derived RNA-guided  
748 endonucleases and nickases. *Genome research* **24**, 132-141, doi:10.1101/gr.162339.113  
749 (2014).
- 750 20 Bothmer, A. *et al.* Characterization of the interplay between DNA repair and CRISPR/Cas9-  
751 induced DNA lesions at an endogenous locus. *Nat Commun* **8**, 13905,  
752 doi:10.1038/ncomms13905 (2017).
- 753 21 Shen, B. *et al.* Efficient genome modification by CRISPR-Cas9 nickase with minimal off-target  
754 effects. *Nature methods* **11**, 399-402, doi:10.1038/nmeth.2857 (2014).
- 755 22 Fauser, F., Schiml, S. & Puchta, H. Both CRISPR/Cas-based nucleases and nickases can be  
756 used efficiently for genome engineering in *Arabidopsis thaliana*. *Plant J* **79**, 348-359,  
757 doi:10.1111/tpj.12554 (2014).
- 758 23 Satomura, A. *et al.* Precise genome-wide base editing by the CRISPR Nickase system in yeast.  
759 *Sci Rep* **7**, 2095, doi:10.1038/s41598-017-02013-7 (2017).
- 760 24 Xu, T. *et al.* Efficient Genome Editing in *Clostridium cellulolyticum* via CRISPR-Cas9 Nickase.  
761 *Appl Environ Microbiol* **81**, 4423-4431, doi:10.1128/AEM.00873-15 (2015).

- 762 25 Schiml, S., Fauser, F. & Puchta, H. The CRISPR/Cas system can be used as nuclease for in  
763 planta gene targeting and as paired nickases for directed mutagenesis in Arabidopsis  
764 resulting in heritable progeny. *Plant J* **80**, 1139-1150, doi:10.1111/tpj.12704 (2014).
- 765 26 Mikami, M., Toki, S. & Endo, M. Precision Targeted Mutagenesis via Cas9 Paired Nickases in  
766 Rice. *Plant Cell Physiol* **57**, 1058-1068, doi:10.1093/pcp/pcw049 (2016).
- 767 27 Tsai, S. Q. *et al.* GUIDE-seq enables genome-wide profiling of off-target cleavage by CRISPR-  
768 Cas nucleases. *Nature biotechnology* **33**, 187-197, doi:10.1038/nbt.3117 (2015).
- 769 28 Kim, D. *et al.* Genome-wide analysis reveals specificities of Cpf1 endonucleases in human  
770 cells. *Nature biotechnology*, doi:10.1038/nbt.3609 (2016).
- 771 29 Chen, J. S. *et al.* CRISPR-Cas12a target binding unleashes indiscriminate single-stranded  
772 DNase activity. *Science* **360**, 436-439, doi:10.1126/science.aar6245 (2018).
- 773 30 Rouet, P., Smih, F. & Jasin, M. Introduction of double-strand breaks into the genome of  
774 mouse cells by expression of a rare-cutting endonuclease. *Mol Cell Biol* **14**, 8096-8106  
775 (1994).
- 776 31 Carroll, D. Genome engineering with targetable nucleases. *Annual review of biochemistry* **83**,  
777 409-439, doi:10.1146/annurev-biochem-060713-035418 (2014).
- 778 32 van Overbeek, M. *et al.* DNA Repair Profiling Reveals Nonrandom Outcomes at Cas9-  
779 Mediated Breaks. *Molecular cell* **63**, 633-646, doi:10.1016/j.molcel.2016.06.037 (2016).
- 780 33 Mao, Z., Bozzella, M., Seluanov, A. & Gorbunova, V. Comparison of nonhomologous end  
781 joining and homologous recombination in human cells. *DNA Repair (Amst)* **7**, 1765-1771,  
782 doi:10.1016/j.dnarep.2008.06.018 (2008).
- 783 34 Chen, F. *et al.* High-frequency genome editing using ssDNA oligonucleotides with zinc-finger  
784 nucleases. *Nature methods* **8**, 753-755, doi:10.1038/nmeth.1653 (2011).
- 785 35 Paquet, D. *et al.* Efficient introduction of specific homozygous and heterozygous mutations  
786 using CRISPR/Cas9. *Nature* **533**, 125-129, doi:10.1038/nature17664 (2016).

- 787 36 Skarnes, W. C., Pellegrino, E. & McDonough, J. A. Improving homology-directed repair  
788 efficiency in human stem cells. *Methods* **164-165**, 18-28, doi:10.1016/j.ymeth.2019.06.016  
789 (2019).
- 790 37 Wang, Y. *et al.* Systematic evaluation of CRISPR-Cas systems reveals design principles for  
791 genome editing in human cells. *Genome biology* **19**, 62, doi:10.1186/s13059-018-1445-x  
792 (2018).
- 793 38 Kan, Y., Ruis, B., Takasugi, T. & Hendrickson, E. A. Mechanisms of precise genome editing  
794 using oligonucleotide donors. *Genome research* **27**, 1099-1111, doi:10.1101/gr.214775.116  
795 (2017).
- 796 39 Liang, X., Potter, J., Kumar, S., Ravinder, N. & Chesnut, J. D. Enhanced CRISPR/Cas9-mediated  
797 precise genome editing by improved design and delivery of gRNA, Cas9 nuclease, and donor  
798 DNA. *Journal of biotechnology* **241**, 136-146, doi:10.1016/j.jbiotec.2016.11.011 (2017).
- 799 40 Richardson, C. D., Ray, G. J., DeWitt, M. A., Curie, G. L. & Corn, J. E. Enhancing homology-  
800 directed genome editing by catalytically active and inactive CRISPR-Cas9 using asymmetric  
801 donor DNA. *Nature biotechnology* **34**, 339-344, doi:10.1038/nbt.3481 (2016).
- 802 41 O'Brien, A. R., Wilson, L. O. W., Burgio, G. & Bauer, D. C. Unlocking HDR-mediated nucleotide  
803 editing by identifying high-efficiency target sites using machine learning. *Scientific reports* **9**,  
804 2788, doi:10.1038/s41598-019-39142-0 (2019).
- 805 42 Yang, L. *et al.* Optimization of scarless human stem cell genome editing. *Nucleic acids*  
806 *research* **41**, 9049-9061, doi:10.1093/nar/gkt555 (2013).
- 807 43 Bialk, P., Rivera-Torres, N., Strouse, B. & Kmiec, E. B. Regulation of Gene Editing Activity  
808 Directed by Single-Stranded Oligonucleotides and CRISPR/Cas9 Systems. *PloS one* **10**,  
809 e0129308, doi:10.1371/journal.pone.0129308 (2015).

- 810 44 Paix, A. *et al.* Precision genome editing using synthesis-dependent repair of Cas9-induced  
811 DNA breaks. *Proceedings of the National Academy of Sciences of the United States of*  
812 *America* **114**, E10745-E10754, doi:10.1073/pnas.1711979114 (2017).
- 813 45 Okamoto, S., Amaishi, Y., Maki, I., Enoki, T. & Mineno, J. Highly efficient genome editing for  
814 single-base substitutions using optimized ssODNs with Cas9-RNPs. *Scientific reports* **9**, 4811,  
815 doi:10.1038/s41598-019-41121-4 (2019).
- 816 46 Renaud, J. B. *et al.* Improved Genome Editing Efficiency and Flexibility Using Modified  
817 Oligonucleotides with TALEN and CRISPR-Cas9 Nucleases. *Cell reports* **14**, 2263-2272,  
818 doi:10.1016/j.celrep.2016.02.018 (2016).
- 819 47 Maruyama, T. *et al.* Increasing the efficiency of precise genome editing with CRISPR-Cas9 by  
820 inhibition of nonhomologous end joining. *Nature biotechnology* **33**, 538-542,  
821 doi:10.1038/nbt.3190 (2015).
- 822 48 Riesenber, S. & Maricic, T. Targeting repair pathways with small molecules increases  
823 precise genome editing in pluripotent stem cells. *Nature communications* **9**, 2164,  
824 doi:10.1038/s41467-018-04609-7 (2018).
- 825 49 Ma, X. *et al.* Small molecules promote CRISPR-Cpf1-mediated genome editing in human  
826 pluripotent stem cells. *Nature communications* **9**, 1303, doi:10.1038/s41467-018-03760-5  
827 (2018).
- 828 50 Pattanayak, V. *et al.* High-throughput profiling of off-target DNA cleavage reveals RNA-  
829 programmed Cas9 nuclease specificity. *Nature biotechnology* **31**, 839-843,  
830 doi:10.1038/nbt.2673 (2013).
- 831 51 Antony, J. S. *et al.* Gene correction of HBB mutations in CD34(+) hematopoietic stem cells  
832 using Cas9 mRNA and ssODN donors. *Mol Cell Pediatr* **5**, 9, doi:10.1186/s40348-018-0086-1  
833 (2018).

- 834 52 Dewari, P. S. *et al.* An efficient and scalable pipeline for epitope tagging in mammalian stem  
835 cells using Cas9 ribonucleoprotein. *eLife* **7**, doi:10.7554/eLife.35069 (2018).
- 836 53 Jacobi, A. M. *et al.* Simplified CRISPR tools for efficient genome editing and streamlined  
837 protocols for their delivery into mammalian cells and mouse zygotes. *Methods* **121-122**, 16-  
838 28, doi:10.1016/j.ymeth.2017.03.021 (2017).
- 839 54 Magoc, T. & Salzberg, S. L. FLASH: fast length adjustment of short reads to improve genome  
840 assemblies. *Bioinformatics* **27**, 2957-2963, doi:10.1093/bioinformatics/btr507 (2011).
- 841 55 Li, H. Minimap2: pairwise alignment for nucleotide sequences. *Bioinformatics* **34**, 3094-3100,  
842 doi:10.1093/bioinformatics/bty191 (2018).

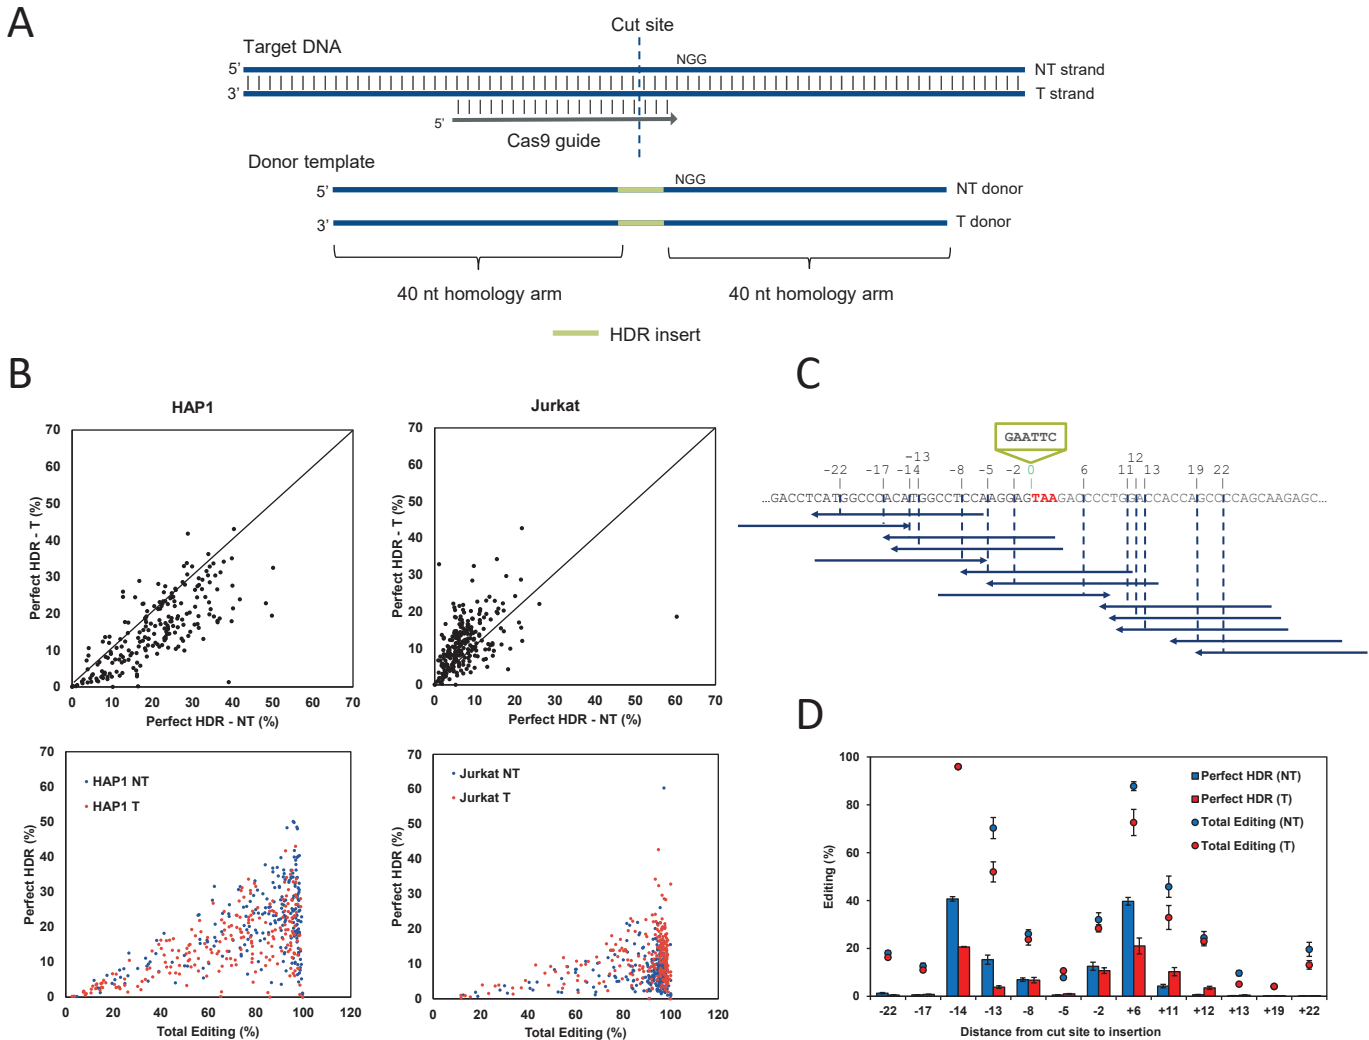

**Figure 1. Cas9 HDR strand preference and gRNA selection.** (A) Schematic representation of targeting (T) and non-targeting (NT) donor template designs. The targeting strand is complementary to the gRNA sequence, whereas the non-targeting strand contains the guide and PAM sequence (B) An EcoRI recognition site was inserted at a Cas9 cleavage site at 254 genomic loci in Jurkat and 239 genomic loci in HAP1 cells using either the T or NT strand as the donor template. RNP complexes (Alt-R S.p. Cas9 Nuclease complexed with Alt-R CRISPR-Cas9 crRNA and tracrRNA) were delivered at 4  $\mu$ M along with 4  $\mu$ M Alt-R Cas9 Electroporation Enhancer and 3  $\mu$ M donor template by nucleofection. Total editing and perfect HDR was assessed via NGS. (C) Schematic of the gRNAs used to facilitate HDR insertion of an EcoRI site before the stop codon of GAPDH (TAA, red) in K562 cells using 13 guides around the desired HDR insertion location (blue, arrows indicate the 3' end). The cleavage sites and associated distance to the desired insertion location (green) for each gRNA are indicated above the sequence shown. Both the T and NT strand were tested. (D) RNP complexes (Alt-R S.p. Cas9 Nuclease, Alt-R CRISPR-Cas9 crRNA and tracrRNA) for the 13 guides targeting GAPDH were delivered at 2  $\mu$ M along with 2  $\mu$ M Alt-R Cas9 Electroporation Enhancer and 2  $\mu$ M donor template designed to insert an EcoRI site before the stop codon by nucleofection to K562 cells. HDR and total editing were assessed via NGS. Data are represented as means  $\pm$  S.E.M. of three biological replicates.

**A**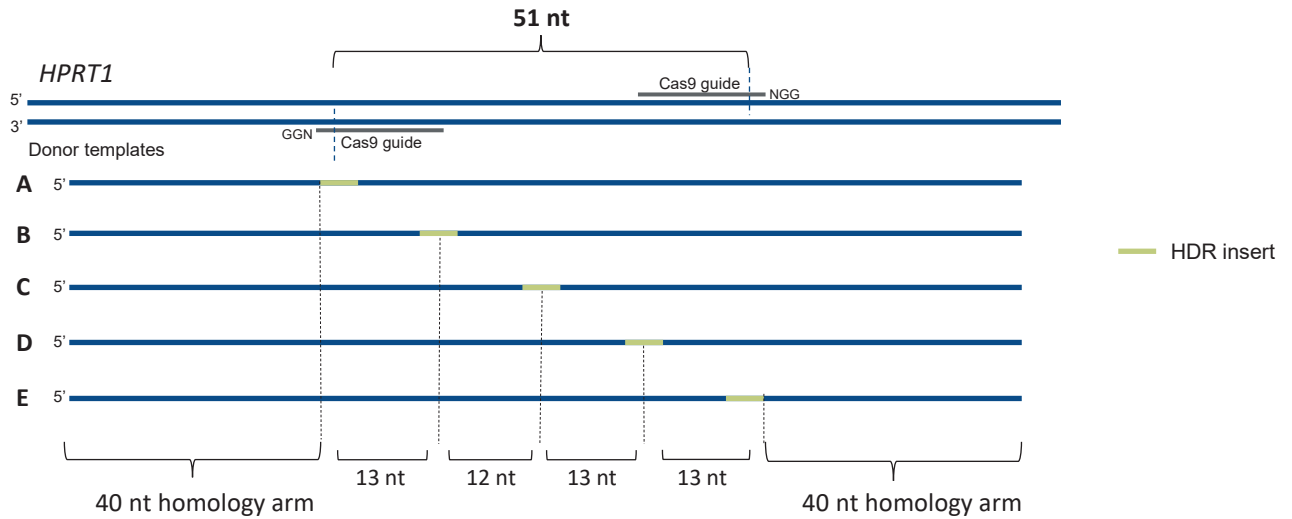**B**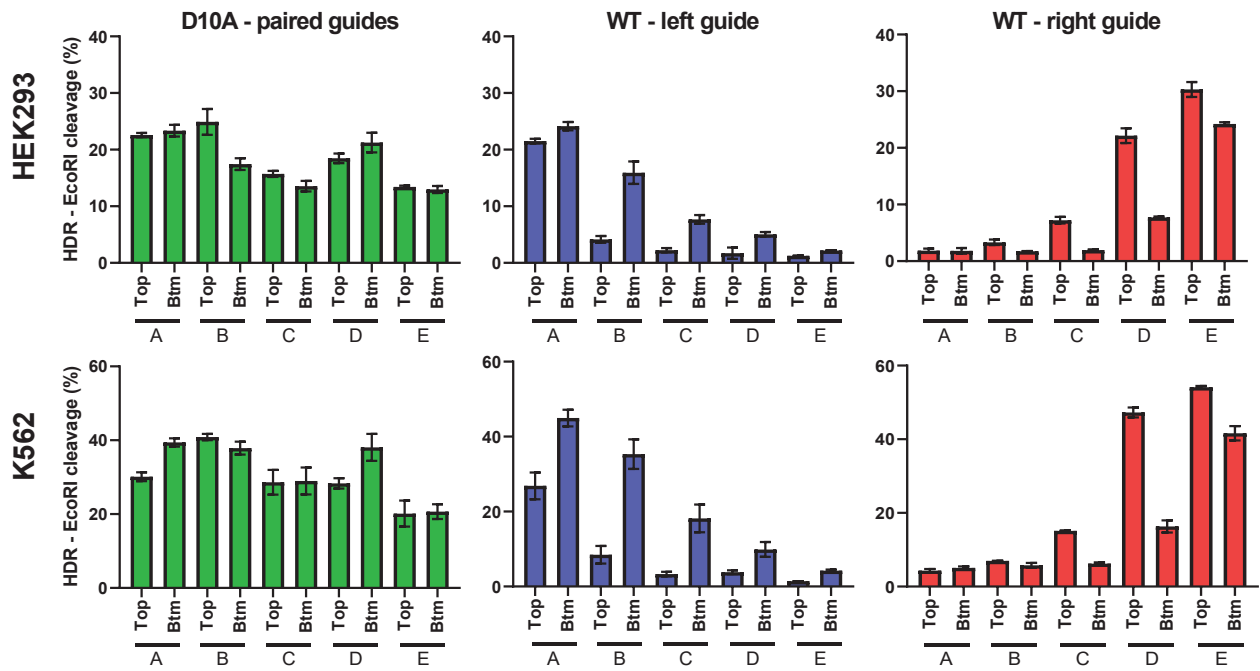

**Figure 2. Cas9 D10A mediates efficient HDR distant from nick sites.** (A) Ten HDR donor templates were designed with an EcoRI sequence positioned at varying distances (0-nt, 13-nt, 25-nt, 38-nt and 51-nt) from the left cleavage site of a paired-guide nickase design with a PAM-out orientation in HPRT1. ssODNs corresponding to the top and bottom (Btm) strand for each sequence were tested. Letters A-E indicate the position of the EcoRI insertion, the top strand ssODN is shown. (B) Cas9 D10A with gRNA pairs (left panel), or Cas9 WT with each of the individual gRNAs (middle and right panel) RNP complexes (Alt-R S.p. Cas9 D10A nickase or Alt-R S.p. Cas9 Nuclease complexed with Alt-R CRISPR-Cas9 crRNA and tracrRNA) were delivered at 4  $\mu$ M (2  $\mu$ M each RNP for nickase paired guides) along with 4  $\mu$ M Alt-R Cas9 Electroporation Enhancer and 2  $\mu$ M donor template by nucleofection to HEK293 cells (top) or K562 cells (bottom). HDR efficiency was evaluated by EcoRI cleavage of targeted amplicons. Data are represented as means  $\pm$  S.E.M of three biological replicates for D10A and two biological replicates for WT.



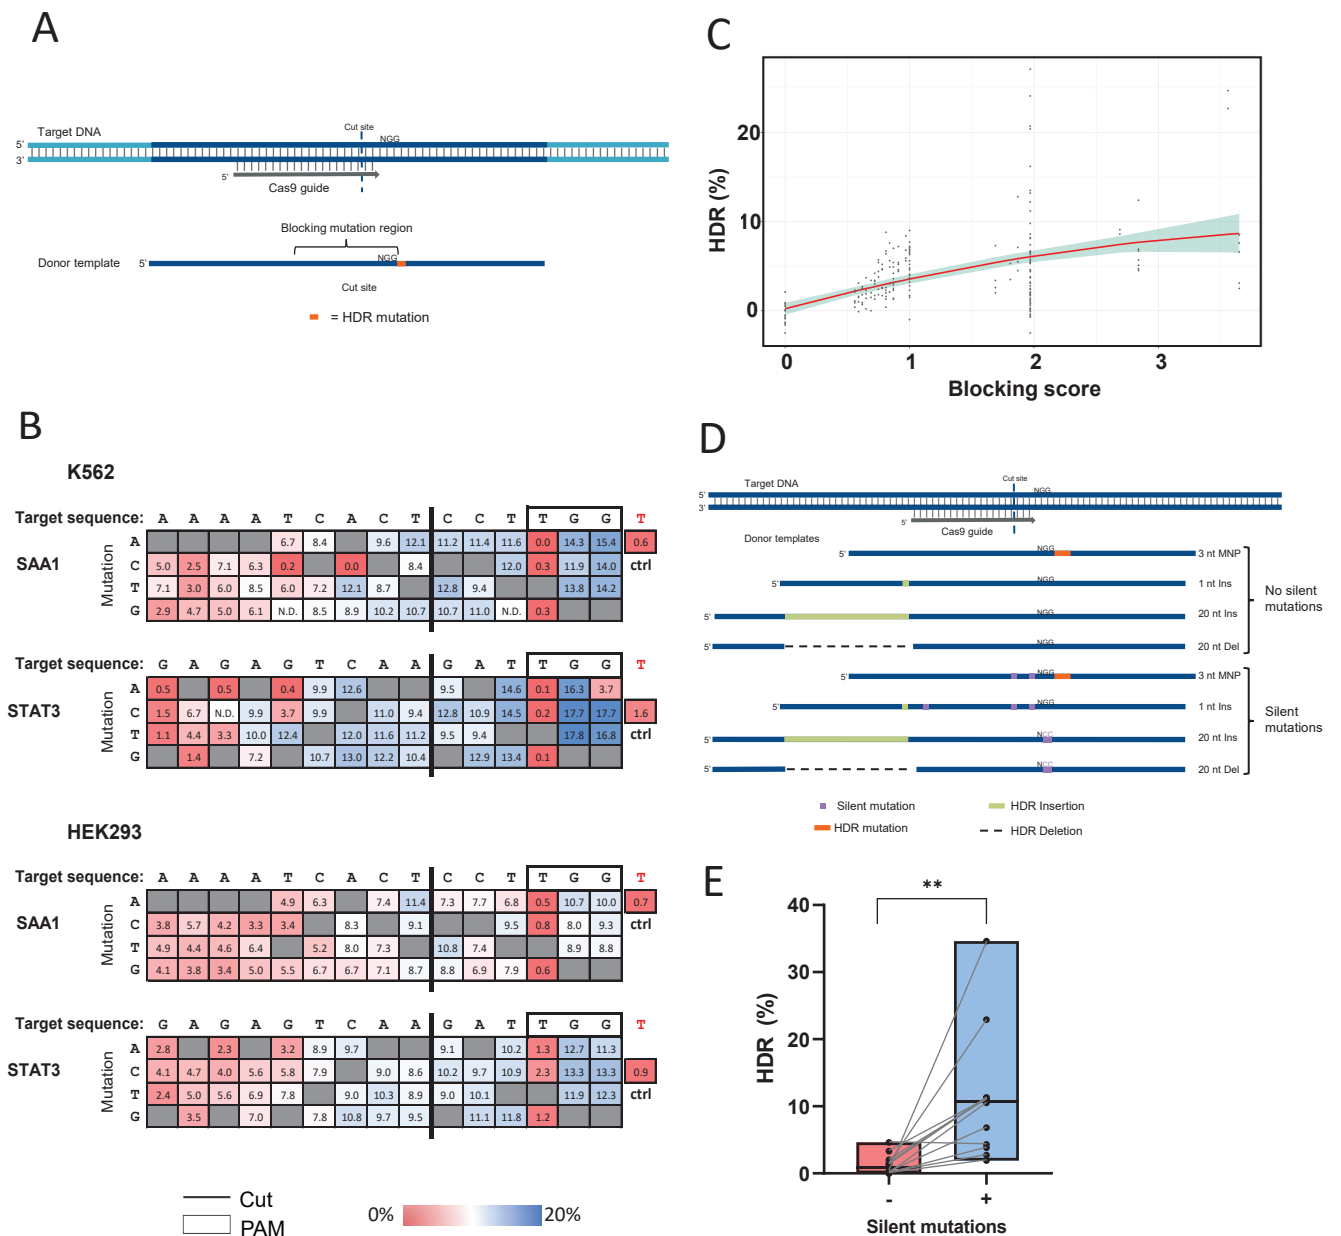

**Figure 3. Optimizing placement and number of blocking mutations with Cas9.** (A) Schematic representation of a desired HDR generated single base change (orange) 3' of the PAM. In addition to the desired HDR mutation, a single blocking mutation in the seed region of the guide or PAM to prevent Cas9 re-cleavage was included in donor templates. Each position in the region indicated was changed to every possible alternate base in a unique donor template that also contained the desired HDR mutation. (B) HDR donors for two genomic loci were tested in HEK293 and K562 cells. In each case the donor contained an HDR mutation 3' of the PAM, with or without a blocking mutation within the region indicated. HDR donors were delivered at 4  $\mu$ M along with RNP complexes (Alt-R S.p. Cas9 Nuclease complexed with Alt-R CRISPR-Cas9 crRNA and tracrRNA) at 4  $\mu$ M and with 4  $\mu$ M Alt-R Cas9 Electroporation Enhancer by nucleofection. Each box represents the rate of perfect HDR including both the desired HDR mutation and blocking mutation (where applicable) as assessed by NGS. Blue indicates a higher HDR frequency, and red indicates a lower HDR frequency. (C) Blocking scores were calculated for 427 samples with known HDR frequencies and used to build a linear model (model = red line, standard error = blue highlight) to determine the optimum HDR efficiency. (D) Schematic representation of four unique HDR mutations that were designed using the Alt-R HDR Design tool either with or without the addition of silent mutations. (E) Four HDR mutations designed using the novel Alt-R HDR Design Tool with (+) or without (-) silent mutations were tested in HEK293, HeLa, and Jurkat cells. RNP complexes (Alt-R S.p. Cas9 Nuclease, Alt-R CRISPR-Cas9 crRNA and tracrRNA) were delivered at 4  $\mu$ M along with 4  $\mu$ M Alt-R Electroporation Enhancer and 4  $\mu$ M donor template in HEK293 and Jurkat cells by nucleofection. RNP complexes (Alt-R S.p. Cas9 Nuclease complexed with Alt-R CRISPR-Cas9 sgRNA) were delivered at 2  $\mu$ M along with 2  $\mu$ M Alt-R Cas9 Electroporation Enhancer and 2  $\mu$ M donor template in HeLa cells by nucleofection. Perfect HDR rates were determined by NGS.

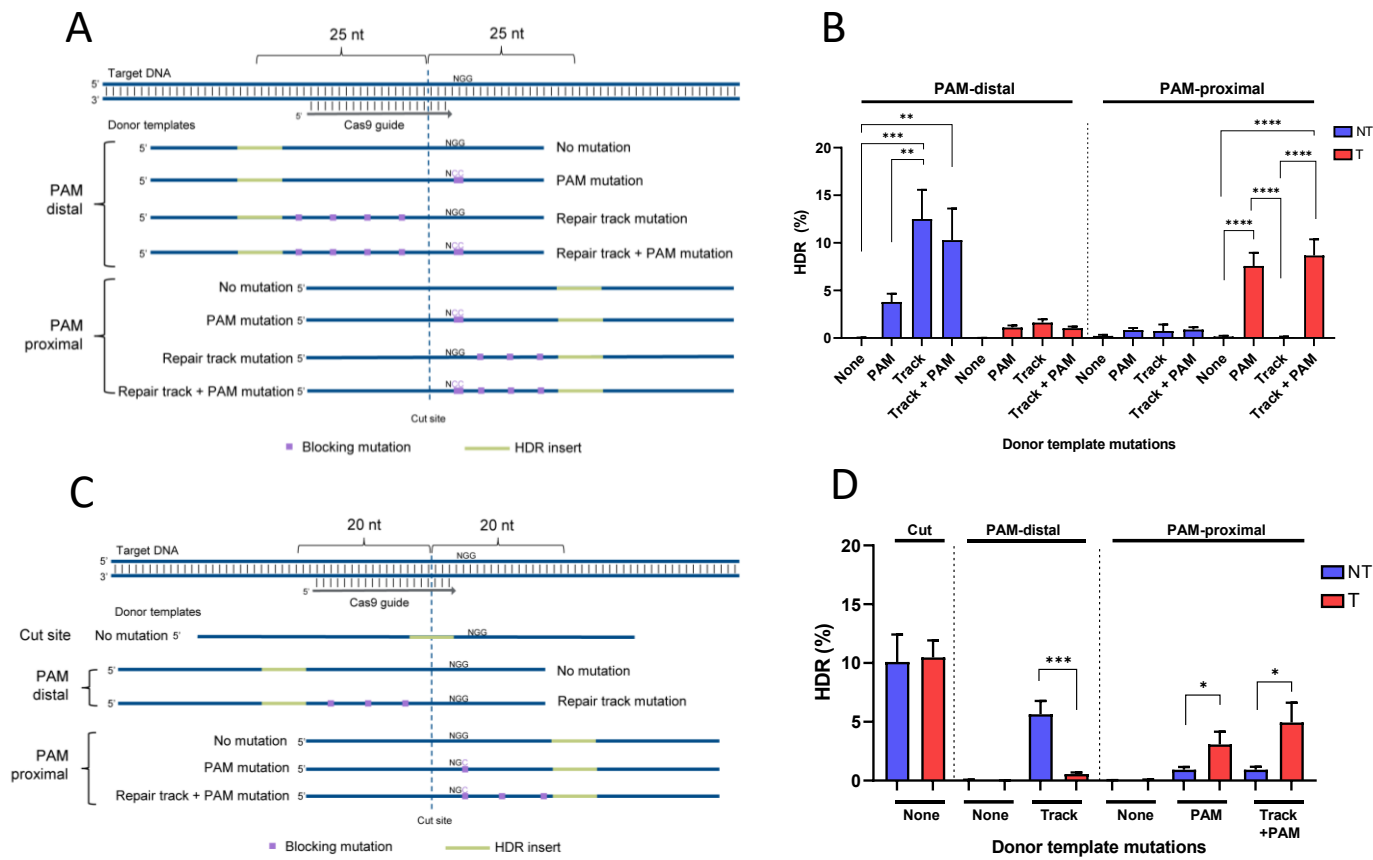

**Figure 4. HDR mutation location determines donor strand preference.** (A) Schematic representation of donor templates used to generate PAM-proximal and PAM-distal insertions 25 bases from a Cas9 cut site with no further mutations (None), PAM mutations (PAM), or mutations in the repair track with or without an additional PAM mutation. The NT strand ssODNs are shown. (B) Donor templates creating an EcoRI insertion 25 bases from the cut site at three genomic loci were delivered to HeLa cells as the T or NT strand. Donor templates contained no further mutation (None), PAM mutation (PAM), or mutations in the repair track (Track). RNP complexes (Alt-R *S.p.* Cas9 Nuclease complexed with Alt-R CRISPR-Cas9 sgRNA) were delivered at 2  $\mu$ M along with 2  $\mu$ M Alt-R Cas9 Electroporation Enhancer and 0.5  $\mu$ M donor template by nucleofection. Perfect HDR rates were determined by NGS. Data are represented as means  $\pm$  S.E.M of the three sites tested. (C) Schematic representation of donor templates used to generate PAM-proximal and PAM-distal insertions 20 bases from a Cas9 cut site with no further mutations (None), PAM mutations (PAM), or mutations in the repair track with or without additional PAM mutation. The NT strand ssODNs are shown. (D) Donor templates creating an EcoRI insertion at the cut site or 20 bases PAM-proximal or PAM-distal to the Cas9 cut site for 12 genomic loci were tested in Jurkat cells as the T or NT strand. RNP complexes (Alt-R *S.p.* Cas9 Nuclease complexed with Alt-R CRISPR-Cas9 sgRNA) were delivered at 4  $\mu$ M along with 4  $\mu$ M Alt-R Cas9 Electroporation Enhancer and 3  $\mu$ M donor template by nucleofection. Perfect HDR rates were determined by NGS. Data are represented as means  $\pm$  S.E.M of the twelve sites tested.

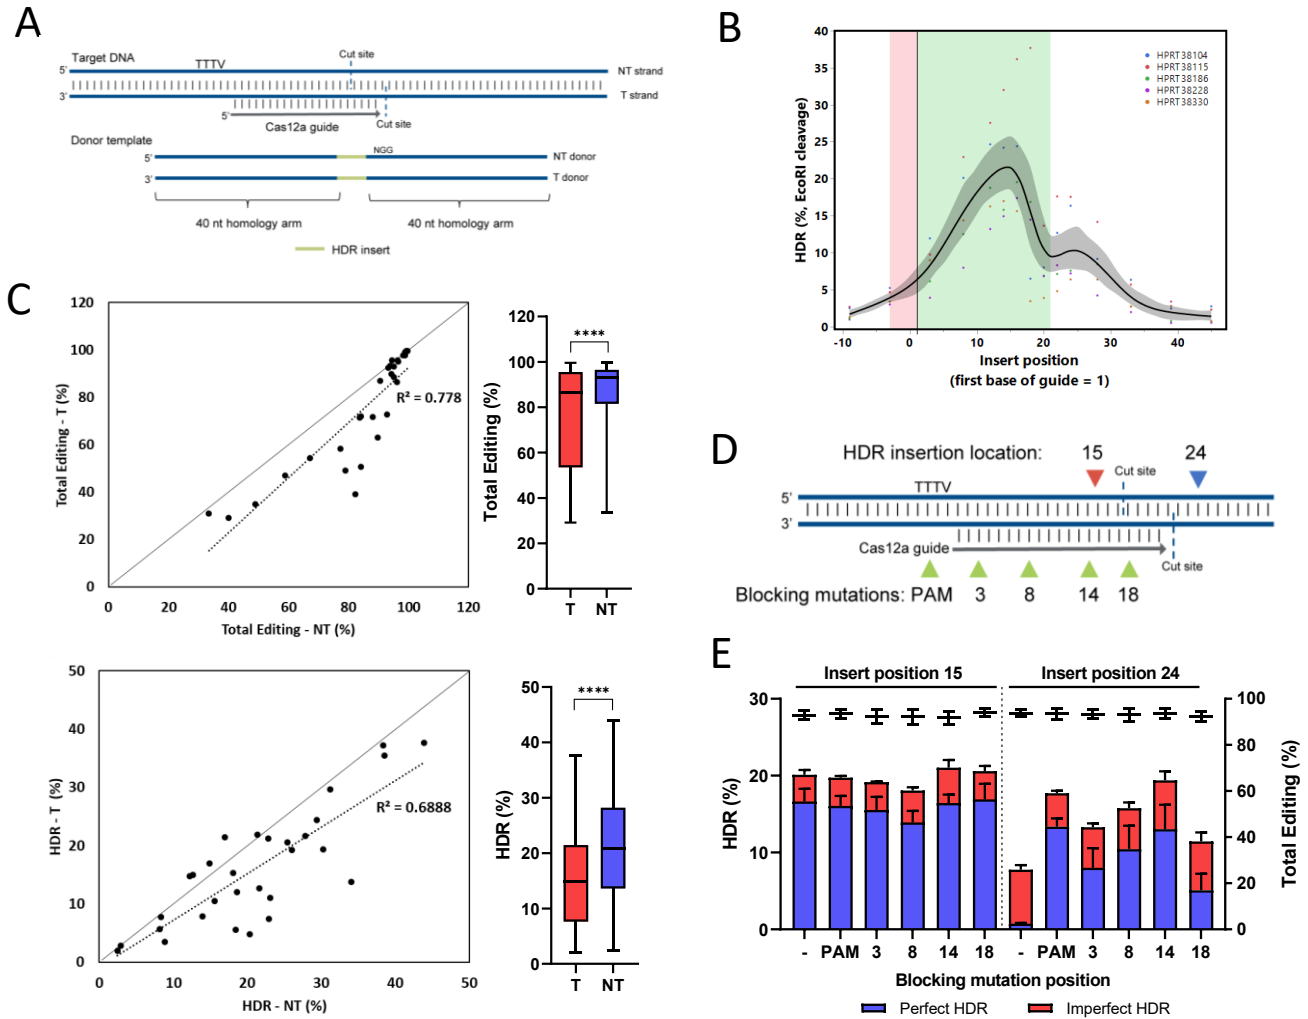

**Figure 5. Cas12a HDR gRNA selection and strand preference.** (A) Schematic representation of targeting (T) and non-targeting (NT) donor template designs. The T strand is complementary to the gRNA sequence, whereas the NT strand contains the guide and PAM sequence. (B) HDR donors were designed with an EcoRI insert sequence positioned at varying distances from the from the first base of the Cas12a guide RNA ranging from 10 bases in the 5' direction to 45 bases in the 3' direction for five genomic loci and delivered to HEK293 cells. RNP complexes (Alt-R A.s. Cas12a nuclease complexed with Alt-R CRISPR-Cas12a crRNA) were delivered at 5  $\mu$ M along with 3  $\mu$ M Alt-R Cpf1 Electroporation Enhancer and 3  $\mu$ M donor template by nucleofection. HDR rates were assessed via EcoRI cleavage of targeted amplicons. The 21-bases where the gRNA targets is highlighted in green. The 4 base 'TTTV' PAM is highlighted in red. The gray shading indicates the confidence of fit. (C) An EcoRI restriction digest recognition site was inserted at position 16 of the gRNA sequence in 15 genomic loci in Jurkat and HAP1 cells using either the T or NT strand as the donor template and the combined results graphed together. RNP complexes (Alt-R A.s. Cas12a *Ultra* nuclease complexed with Alt-R CRISPR-Cas12a crRNA) were delivered at 1  $\mu$ M along with 3  $\mu$ M Alt-R Cpf1 Electroporation Enhancer and 3  $\mu$ M donor template by nucleofection. Total editing and perfect HDR was assessed via NGS. (D) Donors for two genomic loci were designed to insert an EcoRI site within the Cas12a guide sequence (position 15 of the guide) or outside of the guide sequence (24 bases from the start of the guide). ssODNs for these two insert locations were designed with blocking mutations in the PAM or guide sequence. The positions where blocking mutations were incorporated are indicated. (E) Donor templates for two genomic loci in *HPRT1* were tested in Jurkat and Hela cells. RNP complexes (Alt-R A.s. Cas12a *Ultra* complexed with Alt-R CRISPR-Cas12a crRNA) were delivered at 2  $\mu$ M along with 2  $\mu$ M Alt-R Cpf1 Electroporation Enhancer and 3  $\mu$ M donor template by nucleofection. HDR rates were assessed via NGS. Perfect HDR (blue), imperfect HDR (red) and total editing, which includes NHEJ events (black) are shown. Data are represented as means  $\pm$  S.E.M.

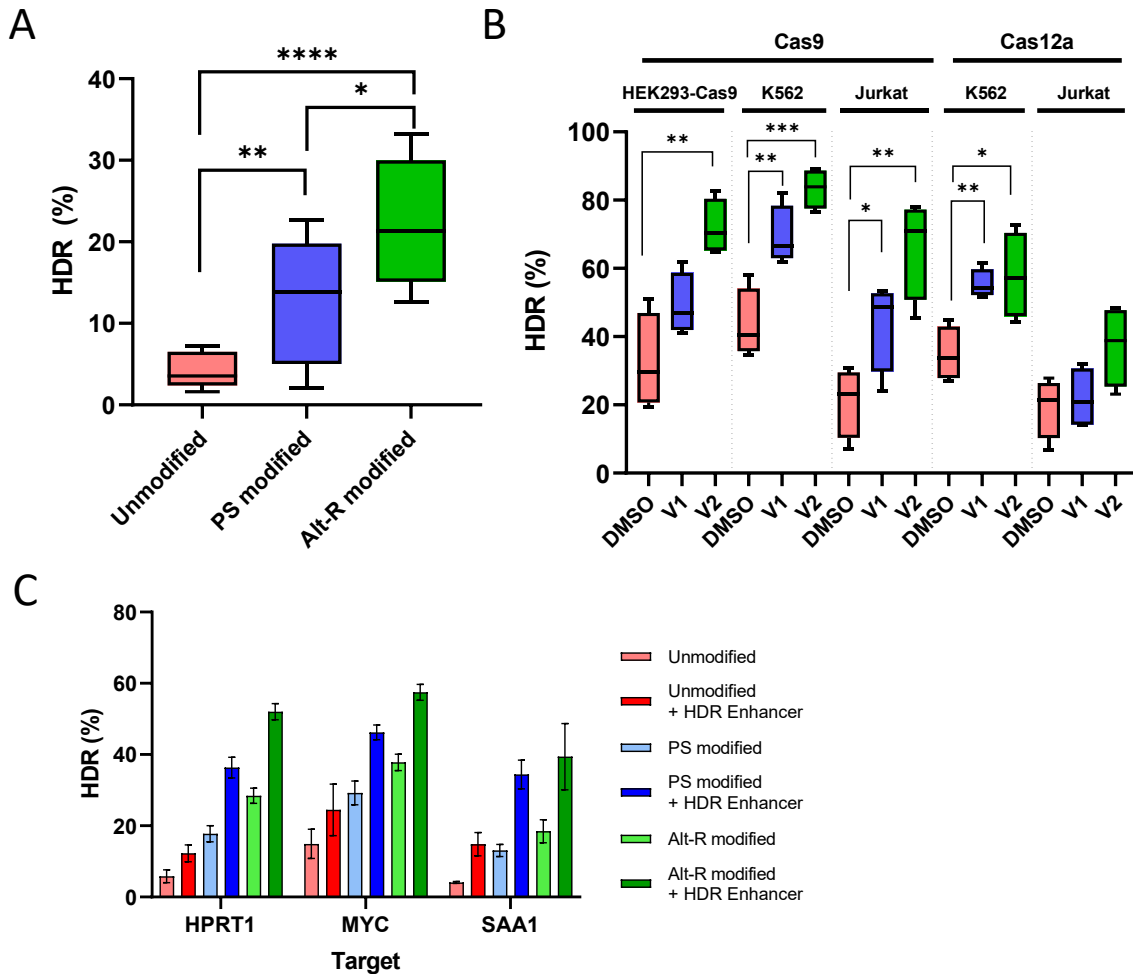

**Figure 6. Alt-R modified HDR Donor oligos and Alt-R HDR Enhancer reagents further improve HDR.** (A) HeLa cells were transfected with 2  $\mu$ M Cas9 RNP complexes (Alt-R *S.p.* HiFi Cas9 Nuclease complexed with Alt-R CRISPR-Cas9 sgRNA) targeting 8 genomic loci along with 0.5  $\mu$ M HDR donor template and 2  $\mu$ M Alt-R Cas9 Electroporation Enhancer by nucleofection. Donor templates contained no modifications (Unmodified), 2 phosphorothioate linkages between the first and last three bases of the template (PS modified), or the Alt-R HDR modification (Alt-R modified). HDR efficiency was measured by NGS. (B) HDR donor templates for four genomic loci for Cas9 and four genomic loci for Cas12a were designed to insert an EcoRI site at the cut site (Cas9) or at the 16<sup>th</sup> base of the guide (Cas12a). To test lipofection delivery, gRNA complexes were delivered at 10 nM gRNA (Alt-R Cas9 crRNA and tracrRNA) with 3 nM donor template into HEK293-Cas9 cells. For Cas9 sites, K562 and Jurkat cells were transfected with 2  $\mu$ M RNP (Alt-R *S.p.* Cas9 Nuclease complexed with Alt-R CRISPR-Cas9 crRNA and tracrRNA), 3  $\mu$ M Alt-R Cas9 Electroporation Enhancer, and 3  $\mu$ M donor template. For Cas12a sites, K562 and Jurkat cells were transfected with 2  $\mu$ M RNP (Alt-R *A.s.* Cas12a *Ultra* complexed with Alt-R CRISPR-Cas12a crRNA), 3  $\mu$ M Alt-R Cpf1 Electroporation Enhancer, and 3  $\mu$ M donor template. Immediately after transfection, cells were plated in media containing a DMSO control, 30  $\mu$ M Alt-R HDR Enhancer V1, or 1  $\mu$ M Alt-R HDR Enhancer V2 and media was changed after 24 hours. HDR efficiency was measured by NGS. (C) HeLa cells were transfected with 2  $\mu$ M Cas9 RNP complexes (Alt-R *S.p.* HiFi Cas9 Nuclease complexed with Alt-R CRISPR-Cas9 crRNA and tracrRNA) targeting 3 genomic loci along with 0.5  $\mu$ M HDR donor template and 2  $\mu$ M Alt-R Cas9 Electroporation Enhancer by nucleofection. Donor templates were unmodified, PS modified, or Alt-R modified. Immediately after electroporation, cells were plated in media with or without 30  $\mu$ M Alt-R HDR Enhancer (V1) and media was changed after 24 hours. HDR efficiency was measured by NGS. Data are represented as means  $\pm$  S.E.M of three biological replicates.

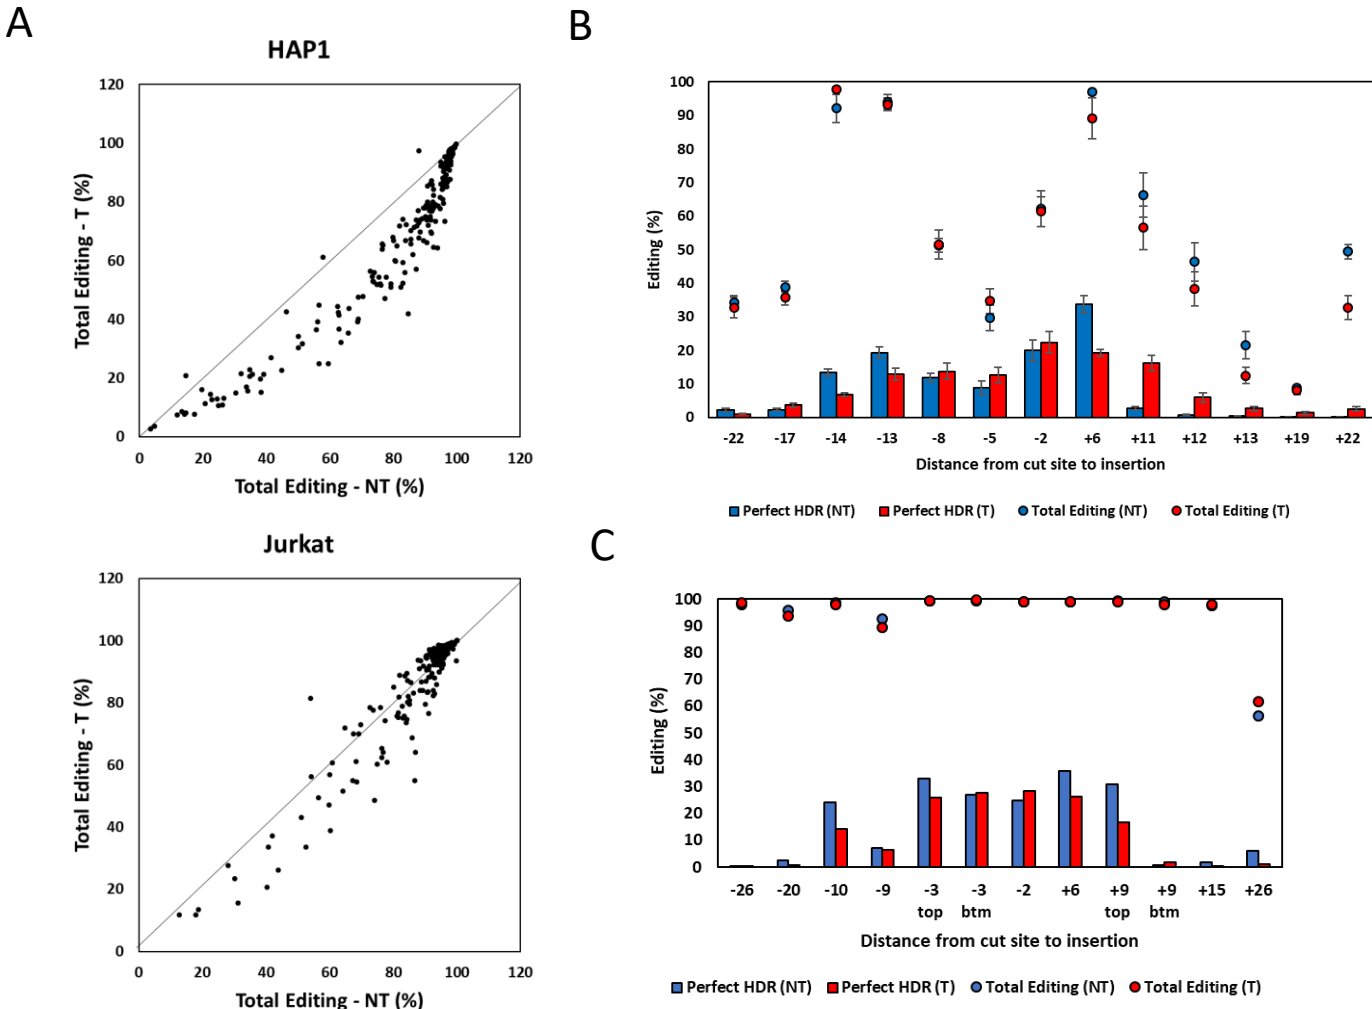

**Supplemental Figure 1** (A) EcoRI restriction digest recognition site (GAATTC) was inserted at the Cas9 cleavage site of 254 genomic loci in Jurkat and 239 genomic loci in HAP1 cells using either the targeting (T) or non-targeting (NT) strand as the donor template. RNP complexes (Alt-R *S.p.* Cas9 Nuclease complexed with Alt-R CRISPR-Cas9 crRNA and tracrRNA) were delivered at 4  $\mu$ M along with 4  $\mu$ M Alt-R Cas9 Electroporation Enhancer and 3  $\mu$ M donor template by nucleofection. Total editing was assessed via NGS. (B) Insertion of an EcoRI site before the stop codon of GAPDH in HEK293 cells using guides around the desired HDR insertion location. The cleavage sites and associated distance to the desired insertion location for each guide are indicated above the sequence shown. Both the T and NT strand were tested. RNP complexes (Alt-R *S.p.* Cas9 Nuclease complexed with Alt-R CRISPR-Cas9 crRNA and tracrRNA) were delivered at 2  $\mu$ M along with 2  $\mu$ M Alt-R Cas9 Electroporation Enhancer and 2  $\mu$ M donor template by nucleofection. HDR and total editing were assessed via NGS. Data are represented as means  $\pm$  S.E.M. of three technical replicates. (C) Insertion of an EcoRI site at the TNPO3 locus in HEK293 cells using guides around the desired HDR insertion location. The distance from each cleavage site to the desired insertion location for each guide are indicated on the x-axis. Two pairs of guides cut at the same location, but on opposite strands. The strand containing the guide is indicated as top or bottom (btm). Both the T and NT strand were tested. RNP complexes (Alt-R *S.p.* Cas9 Nuclease complexed with Alt-R CRISPR-Cas9 crRNA and tracrRNA) were delivered at 2  $\mu$ M along with 2  $\mu$ M Alt-R Cas9 Electroporation Enhancer and 2  $\mu$ M donor template by nucleofection. HDR and total editing were assessed via NGS.

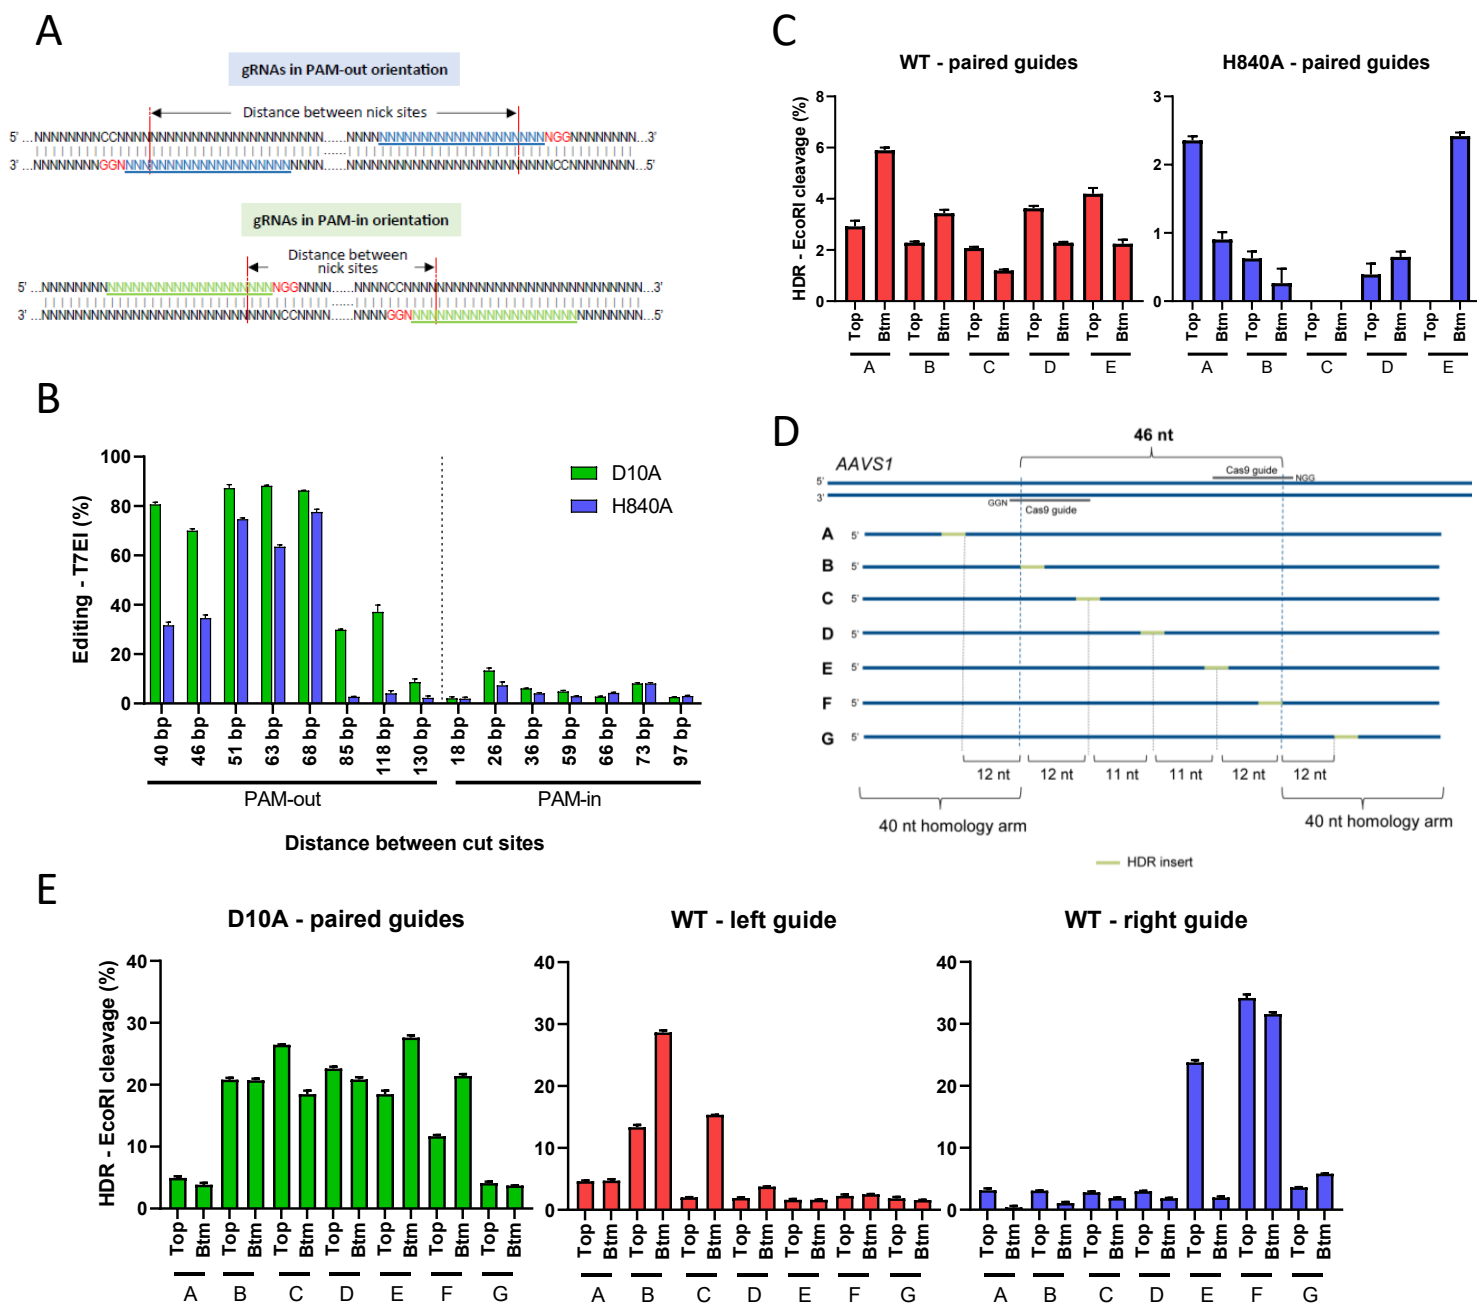

**Supplemental Figure 2** HDR using Cas9 D10A nickase compared to WT Cas9 and Cas9 H840A nickase (A) Schematics showing gRNA pairs in PAM-out orientation (top panel) or PAM-in orientation (bottom panel). NGG PAMs are red, protospacers are underlined. Spacing between paired gRNAs is defined by the distance between targeted nick sites as indicated in the diagram. (B) RNP complexes consisting of gRNA pairs in different orientation and spacing targeting the *HPRT1* locus were delivered into HEK293 cells with Cas9 D10A or H840A proteins via lipofection and total editing was measured by T7EI cleavage. (C) HDR mediated by Cas9 WT (left panel) or Cas9 H840A (right panel) with paired gRNAs. Cas9 WT and Cas9 H840A were used in combination with gRNA pairs targeting *HPRT1* 51-nt PAM-out site. RNP complexes (Alt-R *S.p.* Cas9 Nuclease or Alt-R *S.p.* Cas9 H840A nickase complexed with Alt-R CRISPR-Cas9 crRNA and tracrRNA) were delivered at 4  $\mu$ M (2  $\mu$ M each RNP for nickase paired guides) along with 4  $\mu$ M Alt-R Cas9 Electroporation Enhancer and 2  $\mu$ M donor template by nucleofection. The same set of ssODNs homologous to either the top or bottom (Btm) strand as shown in Figure 2 were used to insert an EcoRI site along the target region. HDR was assessed via EcoRI cleavage. (D) Schematics of HDR donor oligos. HDR donor sequences were designed to insert an EcoRI site at 7 positions along the AAVS1 46-nt PAM-out target region. (E) HDR performance of donor oligos in HEK293 cells. Cas9 D10A with two guides, or Cas9 WT with each of the individual guides were used to induce double strand breaks. Bar charts are showing the HDR rate using indicated oligos homologous to either the top or bottom strand. Data are represented as means  $\pm$  S.E.M of technical triplicates.

A

| Donor ID         | Guide | ACCTCTGGAAAAAGGTAAGA                                      |
|------------------|-------|-----------------------------------------------------------|
| None             | GA    | ACTGTAACCTCTGGAAAAAGGTAAG <b>AGGCA</b> TGAGCTTTCCCCTTGCCT |
| 1 PAM            | GA    | ACTGTAACCTCTGGAAAAAGGTAAG <b>AGGCA</b> TGAGCTTTCCCCTTGCCT |
| 2 PAM            | GA    | ACTGTAACCTCTGGAAAAAGGTAAG <b>AGGCA</b> TGAGCTTTCCCCTTGCCT |
| 1 seed A         | GA    | ACTGTAACCTCTGGAAAAAGGTA <b>ATAGGCA</b> TGAGCTTTCCCCTTGCCT |
| 1 seed B         | GA    | ACTGTAACCTCTGGAAAAAGG <b>TCAGAGGCA</b> TGAGCTTTCCCCTTGCCT |
| 2 seed           | GA    | ACTGTAACCTCTGGAAAAAGG <b>TCATAGGCA</b> TGAGCTTTCCCCTTGCCT |
| 1 PAM + 1 seed A | GA    | ACTGTAACCTCTGGAAAAAGGTA <b>ATAGGCA</b> TGAGCTTTCCCCTTGCCT |
| 1 PAM + 1 seed B | GA    | ACTGTAACCTCTGGAAAAAGG <b>TCAGAGGCA</b> TGAGCTTTCCCCTTGCCT |
| 2 PAM + 1 seed A | GA    | ACTGTAACCTCTGGAAAAAGGTA <b>ATAGGCA</b> TGAGCTTTCCCCTTGCCT |
| 1 PAM + 2 seed   | GA    | ACTGTAACCTCTGGAAAAAGG <b>TCATAGGCA</b> TGAGCTTTCCCCTTGCCT |
| 2 PAM + 2 seed   | GA    | ACTGTAACCTCTGGAAAAAGG <b>TCATAGGCA</b> TGAGCTTTCCCCTTGCCT |

blocking mutation; desired HDR SNP; PAM

B

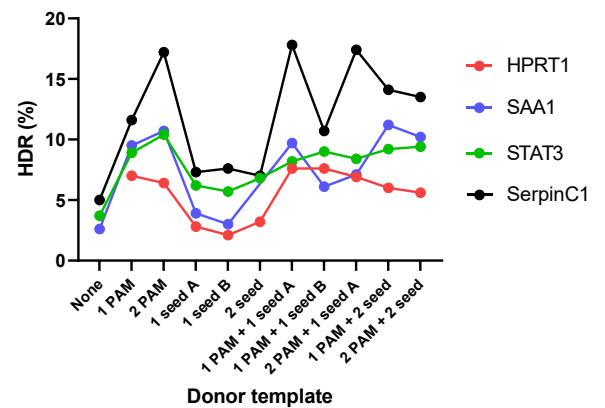

C

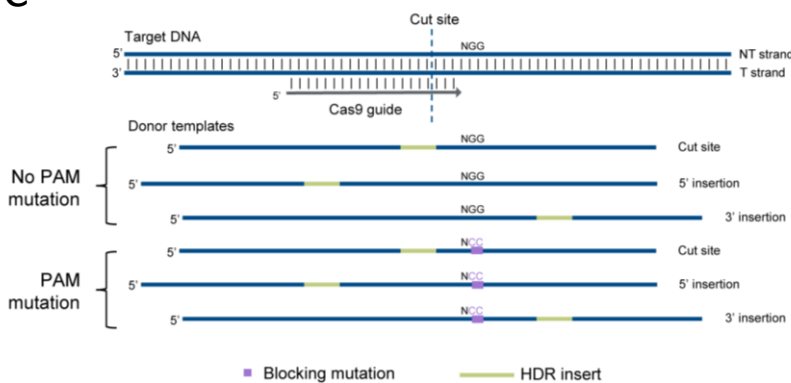

D

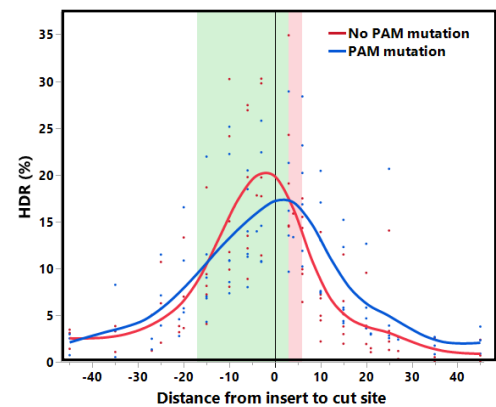

**Supplemental Figure 3** (A) Example sequence of site SERPINC1 showing the various blocking mutation(s) tested. The Cas9 guide is shown above the sequence, and the PAM is bolded. The intended HDR mutation is in red and blocking mutations are shown in blue. (B) Donor templates for four target loci following the design strategy shown in panel A were delivered to Jurkat cells at 4  $\mu$ M along with RNP complexes (Alt-R *S.p.* Cas9 Nuclease complexed with Alt-R CRISPR-Cas9 crRNA and tracrRNA) at 4  $\mu$ M and with 4  $\mu$ M Alt-R Cas9 Electroporation Enhancer by nucleofection. SNP conversion of the desired HDR mutation 3' of the PAM was determined by NGS. (C) Schematic representation of donor templates used to an EcoRI insert sequence positioned at varying distances from the Cas9 cleavage site, ranging up to 45 bases in either the 5' or 3' direction. Donor templates were designed with and without a mutation in the PAM ('NGG' to 'NCC') to prevent Cas9 re-cleavage. (D) HDR performance of donor templates for four genomic loci in Jurkat cells and two genomic loci in HEK293 cells. Negative values indicate the insertion was 5' (PAM-distal) of the cut site, whereas positive values indicate the insertion was 3' (PAM-proximal) of the cut site. RNP complexes (Alt-R *S.p.* Cas9 Nuclease complexed with Alt-R CRISPR-Cas9 crRNA and tracrRNA) were delivered at 4  $\mu$ M along with 4  $\mu$ M Alt-R Cas9 Electroporation Enhancer and 4  $\mu$ M donor template by nucleofection. HDR rates were assessed via EcoRI cleavage of targeted amplicons.

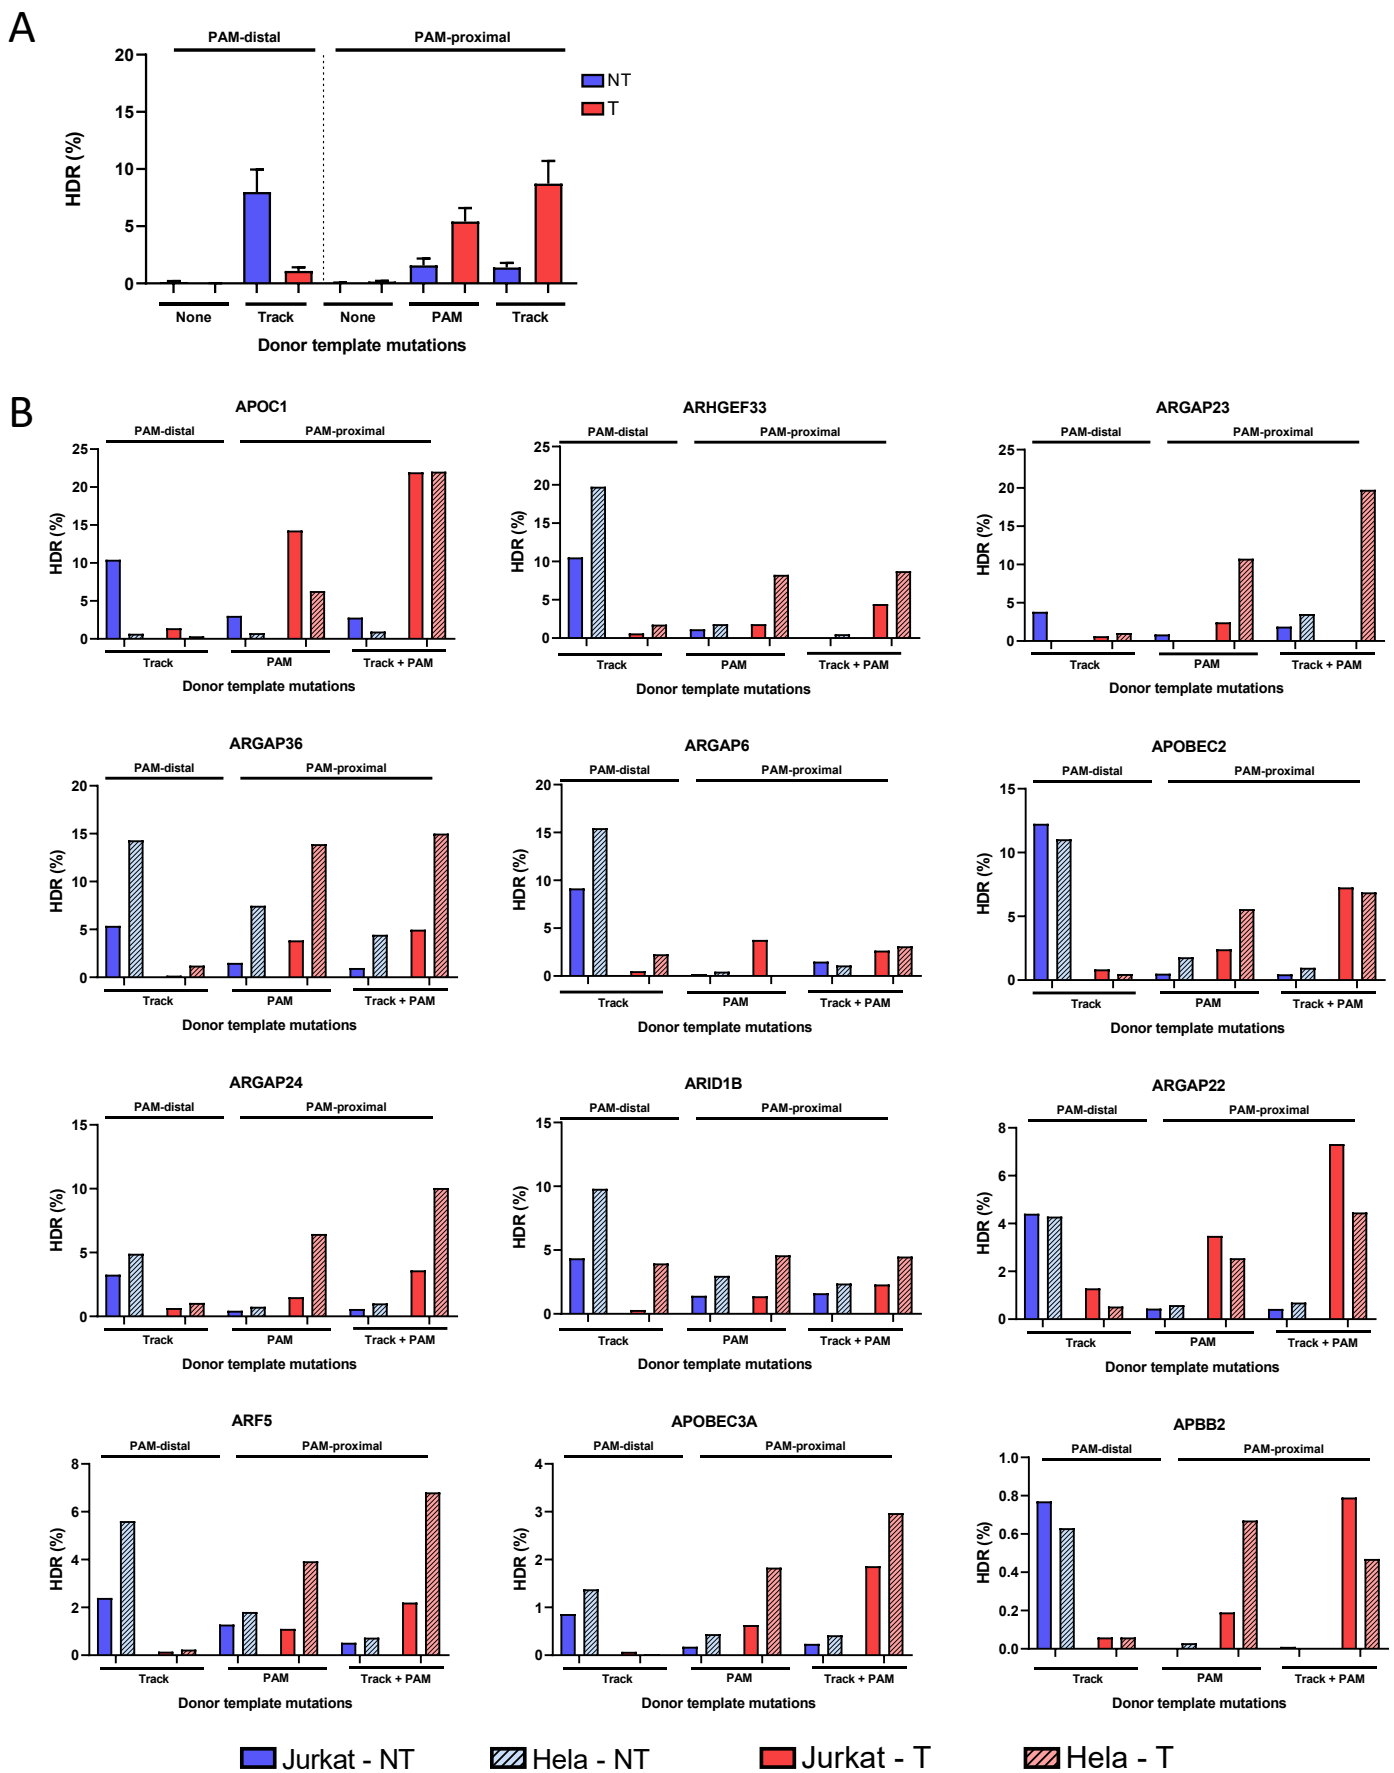

**Supplemental Figure 4** (A) Donor templates creating an EcoRI insertion at the cut site or 20 bases PAM-proximal or PAM-distal to the Cas9 cut site for 12 genomic loci were tested in HeLa cells as the targeting (T) or non-targeting (NT) strand. Donor templates for the PAM-distal insert contained repair track mutations. Donor templates for the PAM-proximal insert contained either PAM mutation or repair track plus PAM mutations. RNP complexes (Alt-R *S.p.* Cas9 Nuclease complexed with Alt-R CRISPR-Cas9 sgRNA) were delivered at 4  $\mu$ M along with 4  $\mu$ M Alt-R Cas9 Electroporation Enhancer and 3  $\mu$ M donor template by nucleofection. Perfect HDR rates were determined by NGS. Data are represented as means  $\pm$  S.E.M. (B) Individual plots of the 12 sites tested in HeLa and Jurkat cells.



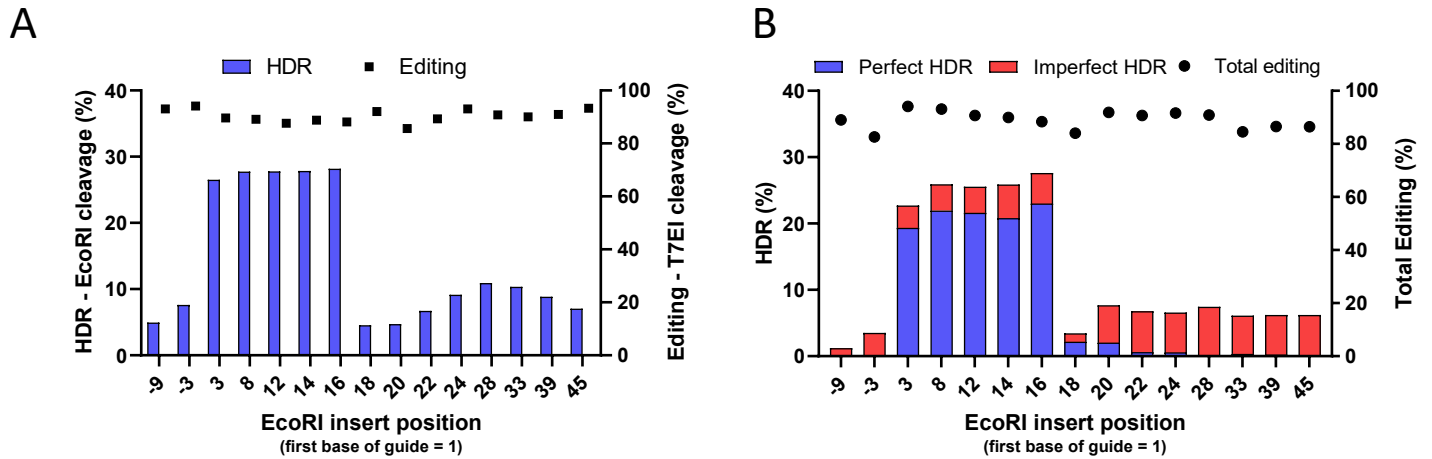

**Supplemental Figure 5** Site HPRT 38330 from Figure 5B was delivered as an RNP complex (Alt-R A.s. Cas12a *Ultra* nuclease complexed with Alt-R CRISPR-Cas12a crRNA) at 2  $\mu$ M along with 3  $\mu$ M Alt-R Cpf1 Electroporation Enhancer and 3  $\mu$ M Alt-R modified donor templates by nucleofection to Jurkat cells. HDR was measured by EcoRI cleavage (A) and NGS analysis (B) to determine the frequency of perfect HDR (blue) relative to imperfect HDR (red) and total editing (black dots).
